# Supplementary material
Source: PubMed Central journal article supplement (PMC6488480)
Supplement: supp_7.2.E306_2018-0097-1-at.pdf [file supp_7.2.E306_2018-0097-1-at.pdf]

## Appendix 1 (as supplied by the authors): Cost estimation

Healthcare costs are derived from the perspective of Ontario's Ministry of Health and Long-Term Care. The costing methodology computes costs for services utilized during encounters with the publicly funded healthcare system, with the approach to costing differing based on the type of encounter.<sup>1</sup> Table 1, summarizes the databases used to identify healthcare utilization and the costing approach for each health sector. The databases and costing algorithm used in this study are held and maintained by ICES.

### Administrative databases to identify healthcare use and methods for cost estimation

| Cost sector                                     | Database Source                                   | Description of database                                                                                                                                                                        | Method of cost estimation                                                                                                                                           |
|-------------------------------------------------|---------------------------------------------------|------------------------------------------------------------------------------------------------------------------------------------------------------------------------------------------------|---------------------------------------------------------------------------------------------------------------------------------------------------------------------|
| <b>Hospital</b>                                 |                                                   |                                                                                                                                                                                                |                                                                                                                                                                     |
| Inpatient acute care                            | CIHI Discharge Abstract Database (CIHI-DAD)       | Demographic, administrative and clinical data on acute care hospital separations in Ontario.                                                                                                   | Resource intensity weights (RIW) <sup>2</sup> multiplied by cost per weighted case (CPWC)                                                                           |
| Emergency room visits                           | National Ambulatory Care Reporting System (NACRS) | Captures administrative, demographic and clinical data for emergency department and ambulatory care visits in Ontario.                                                                         | RIW x CPWC                                                                                                                                                          |
| Same day surgery                                | NACRS<br>CIHI Same Day Surgery (CIHI-SDS)         | Contains administrative and patient-level clinical and demographic data for day surgery hospitals in Ontario.                                                                                  | RIW x CPWC                                                                                                                                                          |
| Outpatient clinic visits                        | NACRS                                             |                                                                                                                                                                                                | RIW x CPWC                                                                                                                                                          |
| <b>Physician services</b>                       |                                                   |                                                                                                                                                                                                |                                                                                                                                                                     |
| Fee for service claims and shadow-billed claims | Ontario Health Insurance Plan (OHIP)              | Claims data for services provided by eligible providers (includes physicians, nurse practitioners, and laboratories).                                                                          | Claims-based: billed costs per visit and services provided based on the province's approved rates.                                                                  |
| Primary care capitation based models            | Client Agency Program Enrolment                   | Contains information on individuals enrolled in a primary care model in Ontario                                                                                                                | Capitation payments: base rate multiplied by age-sex multiplier, with adjustment for relevant premiums                                                              |
| <b>Complex Continuing Care</b>                  | Continuing Care Reporting System (CCRS)           | Captures administrative, demographic, clinical and functional data on individuals receiving continuing care services in designated facilities (hospitals and long-term care homes) in Ontario. | Cost derived from case mix index, number of days in care and resource utilization groups: weighted length of stay (LOS) multiplied by cost per weighted day (CPWD). |
| <b>Long-term Care</b>                           | CCRS                                              |                                                                                                                                                                                                | Cost estimated from fixed per diem costs based on payment rates set by the province multiplied by LOS.                                                              |
| <b>Rehabilitation</b>                           | National Rehabilitation Reporting System (NRS)    | Contains administrative, demographic and other client-level data from participating adult inpatient rehabilitation facilities and programs across Ontario                                      | Rehabilitation cost weights (RCW) x rehabilitation CPWC                                                                                                             |

| <b>Cost sector</b>        | <b>Database Source</b>                                                     | <b>Description of database</b>                                                                                                                 | <b>Method of cost estimation</b>                                                                                                                                    |
|---------------------------|----------------------------------------------------------------------------|------------------------------------------------------------------------------------------------------------------------------------------------|---------------------------------------------------------------------------------------------------------------------------------------------------------------------|
| <b>Mental health care</b> | Ontario mental health reporting system                                     | Captures data on individuals receiving adult mental health services in designated inpatient facilities in Ontario.                             | Cost derived from case mix index, number of days in care and resource utilization groups: weighted length of stay (LOS) multiplied by cost per weighted day (CPWD). |
| <b>Home Care</b>          | Home Care Database (HCD) Resident Assessment Instrument-Home Care (RAI-HC) | Contains administrative, demographic and other client-level data on provincially funded home care services.                                    | Standard cost per service multiplied by the number of hours (or visits) of service.                                                                                 |
| <b>Prescription drugs</b> | Ontario Drug Benefit                                                       | Captures claims for prescriptions dispensed to Ontarians eligible for the Ontario Drug Benefit program (primarily individuals $\geq 65$ years) | Total costs paid by the provincial health plan for eligible individuals.                                                                                            |
| <b>Non-physician</b>      | OHIP                                                                       |                                                                                                                                                | Billed costs per visit and services provided by eligible non-physician providers.                                                                                   |
| <b>Laboratory</b>         | OHIP                                                                       |                                                                                                                                                | Costs based on established diagnostic tests fees (technical and professional fees)                                                                                  |
| <b>Assistive device</b>   | Assistive Devices Program (ADP)                                            |                                                                                                                                                | Amount paid by the province to individuals for high-cost medical equipment.                                                                                         |

\*CIHI - Canadian Institute for Health Information

## References

1. Wodchis WP, Bushmenev K, Nikitovic M, McKillop I. Guidelines on Person-Level Costing Using Administrative Databases in Ontario [Internet]. 2013: [http://www.hsprn.ca/uploads/files/Guidelines\\_on\\_PersonLevel\\_Costing\\_May\\_2013.pdf](http://www.hsprn.ca/uploads/files/Guidelines_on_PersonLevel_Costing_May_2013.pdf) Last Accessed: May 23, 2018
2. Canadian Institute for Health Information. Case Mix: <https://www.cihi.ca/en/submit-data-and-view-standards/methodologies-and-decision-support-tools/case-mix> Last Accessed: November 2, 2018
