# Supplementary material
Source: PubMed Central journal article supplement (PMC6488480)
Supplement: supp_7.2.E306_2018-0097-original-submission.pdf [file supp_7.2.E306_2018-0097-original-submission.pdf]

**Title Page**

Article Title:

Trends in site of death and healthcare utilization at the end of life: A population-based cohort study

Article Type:

Retrospective cohort study

Authors:

Andrea D Hill, PhD (corresponding author)  
Sunnybrook Health Sciences Centre, Department of Critical Care and Sunnybrook Research Institute

Funding: none

Competing interest: none

[Andrea.Hill@sunnybrook.ca](mailto:Andrea.Hill@sunnybrook.ca)

Therese A Stukel, PhD  
Institute for Clinical Evaluative Sciences, Toronto ON; Institute of Health Policy, Management and Evaluation, University of Toronto, Canada

Funding: none

Competing interest: none

Longdi Fu, MSc  
Institute for Clinical Evaluative Sciences

Funding: none

Competing interest: none

Damon C. Scales MD PhD  
Department of Critical Care Medicine, Sunnybrook Health Sciences Centre  
Interdepartmental Division of Critical Care, University of Toronto  
Institute for Clinical Evaluative Sciences, Toronto, Ontario

Funding: none

Competing interest: none

Andreas Laupacis MD, MSc.,  
Li Ka Shing Knowledge Institute of St. Michael's Hospital, Toronto  
Faculty of Medicine, University of Toronto

Funding: none

Competing interest: none

Gordon D. Rubinfeld, MD MSc  
Interdepartmental Division of Critical Care Medicine University of Toronto,  
Sunnybrook Health Sciences Center.

Funding: none

Competing interest: none

1  
2  
3 Hannah Wunsch, MD MSc  
4 Sunnybrook Health Sciences Centre, Department of Critical Care and Sunnybrook  
5 Research Institute  
6 Department of Anesthesia and Interdepartmental Division of Critical Care Medicine,  
7 University of Toronto  
8 Funding: none  
9 Competing interest: none  
10  
11

12 James Downar, MDCM, MHSc,  
13 Palliative Care and Critical Care, UHN and Sinai Health System  
14 Divisions of Critical Care and Palliative Care, University of Toronto  
15 Funding: Funded by an Associated Medical Services, Inc. Phoenix Fellowship.  
16 Competing interests: None  
17  
18

19 Kenneth Rockwood, MD  
20 Dalhousie University  
21

22 Daren K. Heyland MD, MSc.  
23 Department of Critical Care Medicine, Queen's University, Kingston Ontario  
24 Funding: none  
25 Competing interest: none  
26  
27

28 Samir K. Sinha, MD, DPhil  
29 Department of Medicine, Sinai Health System and the University Health Network  
30 Department of Medicine, University of Toronto  
31 Funding: Peter and Shelagh Godsoe Chair in Geriatrics  
32 Competing interest: none  
33  
34

35 Camilla Zimmermann, MD, PhD  
36 Division of Medical Oncology, Department of Medicine, University of Toronto;  
37 Division of Palliative Care, Department of Supportive Care, University Health  
38 Network  
39 Funding statement: Rose Family Chair in Supportive Care  
40 Competing interest: none  
41  
42

43 Sonal Gandhi, MD, MSc  
44 Sunnybrook Health Sciences and the University of Toronto  
45 Funding: none  
46 Competing interest: none  
47  
48

49 Jeff Myers MD, MEd  
50 Division of Palliative Care, Faculty of Medicine, University of Toronto  
51 Division of Palliative Care, Sinai Health System  
52

53 Heather J. Ross, MD, MHSc  
54 University Health Network  
55  
56  
57  
58  
59  
60

1  
2  
3 Jean F. Kozak, PhD  
4 School of Population and Public Health, UBC and Department of Family and  
5 Community Medicine, Providence Health Care

6 Funding: none

7 Competing interest: none  
8  
9

10 Scott Berry MD, MHSc  
11 Sunnybrook Health Sciences Centre  
12

13 Shelly P. Dev, MD  
14 Department of Critical Care Medicine, Sunnybrook Health Sciences Centre,  
15 University of Toronto,  
16  
17

18 Ignazio La Delfa, MD  
19 St. Michael's Hospital  
20 Department of Medicine, University of Toronto  
21

22 Robert A. Fowler, MDCM, MS(Epi)  
23 Department of Critical Care Medicine, Sunnybrook Health Sciences Centre  
24 Interdepartmental Division of Critical Care and Institute for Health Policy,  
25 Management and Evaluation, University of Toronto  
26 Institute for Clinical Evaluative Sciences, Toronto, Ontario  
27

28 Funding: none

29 Competing interest: none  
30  
31

32  
33 Manuscript word count: 3388  
34  
35

36 Abstract word count: 250  
37  
38

39  
40 Key words: end-of-life care, palliative care, critical care, health services research,  
41 cost  
42  
43  
44  
45  
46  
47  
48  
49  
50  
51  
52  
53  
54  
55  
56  
57  
58  
59  
60

## Abstract

**Background:** High rates of healthcare utilization at the end of life may be a marker of care that does not align with patient-stated preferences. We sought to describe trends in end-of-life care and factors associated with dying in-hospital.

**Methods:** We conducted a population-level retrospective cohort study of adult decedents in Ontario between 2004 and 2014. We used linked administrative datasets to determine healthcare utilization and costs during the 6-months before death and place of death.

**Results:** In the last 6-months of life, 77% of 962,426 decedents presented to an emergency department, 68% were admitted to a hospital, 19% were admitted to an intensive care unit, and 14% received mechanical ventilation. Forty-five percent of all deaths occurred in hospital, declining marginally over time while receipt of palliative care increased; during terminal hospital admissions, from 14.0% in 2004 to 29.3% in 2014 ( $p < 0.001$ ) and the last 6-months of life (from 28.1% in 2004 to 57.7% in 2014,  $p < 0.001$ ). The proportion of decedents presenting to the emergency room, admitted to hospital or ICU in the last 6-months of life did not change over 11 years. The mean total healthcare costs in the last 6-months of life were highest amongst those dying in hospital, with the majority of costs attributable to inpatient medical care.

**Interpretation:** Healthcare utilization in the last 6-months of life was substantial and did not decrease over time. Increased capacity for palliative, hospice and home-care

1  
2  
3  
4  
5  
6  
7  
8  
9  
10  
11  
12  
13  
14  
15  
16  
17  
18  
19  
20  
21  
22  
23  
24  
25  
26  
27  
28  
29  
30  
31  
32  
33  
34  
35  
36  
37  
38  
39  
40  
41  
42  
43  
44  
45  
46  
47  
48  
49  
50  
51  
52  
53  
54  
55  
56  
57  
58  
59  
60

at the end of life may help to better align health system resources with patient preferences.

Confidential

## Background

High-quality end-of-life care is important for patients, families, and is an increasing focus for policy makers and the research community. While there is marked international variability in end-of-life care practices<sup>1-3</sup> among industrialized countries, including Canada, there are high rates of deaths in hospital and use of resource intensive services, including admissions to an intensive care unit (ICU).<sup>1</sup> This resource-intensive care often does not align with patient-stated preferences and accounts for a significant proportion of healthcare expenditures.<sup>4-6</sup>

Earlier reports have emphasized gaps in the provision of quality end-of-life care for dying Canadians and their families.<sup>7, 8</sup> Amidst a rapidly aging Canadian population and accompanied large increase in the prevalence of chronic diseases and frailty, whether and to what extent these gaps remain is largely unknown. Measuring trends and current healthcare practices at the end of life is essential to better align patient preferences and health needs with health system resources and policies. However, estimates of temporal trends in healthcare resource use at the end of life are conflicting. For example, some studies suggest declining rates of hospital death,<sup>9, 10</sup> while others do not.<sup>11, 12</sup> In Canada, analyses between 1994 and 2004 found decreasing rates of hospital deaths,<sup>9</sup> however, whether this trend has continued or how it applies to other markers of end-of-life care is unclear. We sought to describe contemporary temporal patterns in place of death, health care utilization and costs at the end of life and to identify factors associated with dying in a hospital in Ontario.

## Methods

### *Design and Settings*

We conducted a population-based cohort study in Ontario, Canada's largest province (population 13.6 million, of whom approximately 16% are 65 years or over). Most physician and hospital services are universally insured for all residents of Ontario, through the province's single-payer publicly funded health system, with health services planning and delivery coordinated by the provinces 14 Local Health Integration Networks (LHINs).

We identified individuals ( $\geq 18$  years) who died between April 1, 2004 and March 31, 2015, using the Registered Persons Database (RPDB), which contains vital statistics data on all residents of Ontario, including date of and age at death. We used the Office of the Registrar General for Deaths (ORGD) database to identify cause of death. To describe healthcare utilization and costs prior to death, information on decedents were linked to population-based health administrative datasets using unique encrypted identifiers. These datasets included the Canadian Institute for Health Information's Discharge Abstract Database (DAD), which captures data on all acute care hospital admissions in Ontario; the National Ambulatory Care Reporting System (NACRS), which contains information on hospital-based ambulatory services, including emergency department visits, day surgery and outpatient clinics; the Continuing Care Reporting System (CCRS) which includes demographic and clinical information on individuals receiving facility-based continuing care services; and the Home Care Database (HCD), which captures data on receipt of publicly

1  
2  
3 funded home care services, including date and type of services. Information on  
4  
5 physician services, including date and type of medical services provided, and billing  
6  
7 claims for inpatient and outpatient services were obtained from the Ontario Health  
8  
9 Insurance Plan (OHIP) database. Healthcare cost data were from a health care  
10  
11 payer perspective (Ontario Ministry of Health and Long-term Care - MOHLTC) and  
12  
13 were estimated from these health administrative datasets using an established  
14  
15 approach for person-level costing.<sup>13, 14</sup> The algorithm summarizes costs attributed to  
16  
17 a number of health sectors, for example, inpatient acute care, emergency room  
18  
19 visits, complex continuing care and physician services (see Supplemental Appendix  
20  
21 for details). Briefly, costs for institutional care (for example hospital and rehabilitation  
22  
23 admissions) were derived by applying resource intensity weights for the specific care  
24  
25 sector to the cost per weighted case determined from amounts paid by the  
26  
27 MOHLTC. Costs for health services associated with specific fees (for example  
28  
29 physician visits, diagnostic tests, drug costs) were based directly on the fee paid per  
30  
31 use of these services.<sup>13</sup> All costs were adjusted to 2014 Canadian dollars. These  
32  
33 datasets were linked using unique encoded identifiers and analyzed at the Institute  
34  
35 for Clinical Evaluative Sciences (ICES).  
36  
37  
38  
39  
40  
41  
42  
43

#### 44 *Variables*

45  
46 We examined health services use during the 6-months prior to death, including the  
47  
48 number of acute care hospitalizations, emergency department admissions, receipt of  
49  
50 mechanical ventilation, and number of physician visits. For decedents who were  
51  
52 admitted to hospital within the 6-months prior to death, we identified the number of  
53  
54  
55  
56  
57  
58  
59  
60



1  
2  
3 admissions to an intensive care unit (ICU) using special care unit codes in the  
4  
5 DAD.<sup>15, 16</sup> We also measured the total inpatient and ICU days for these individuals.  
6  
7 Place of death was classified as occurring in a hospital, at home, in a long-term care  
8  
9 facility, or in another location. This classification was performed using information  
10  
11 contained in the vital status (RPDB), hospital (DAD) and emergency department  
12  
13 (NACRS) databases. Deaths in hospital were further classified according to whether  
14  
15 they occurred in an ICU.  
16  
17  
18  
19  
20

21  
22 Receipt of palliative care was identified by codes contained in the home care (HCD),  
23  
24 hospital (DAD), emergency department (NACRS), long-term care and complex  
25  
26 continuing care (CCRS) and physician billing (OHIP) databases for palliative care  
27  
28 services, consistent with a prior study.<sup>17</sup> Decedents' demographics, including age,  
29  
30 sex, income, location of residence, and cause of death were measured at the time of  
31  
32 death. Income (ascribed as neighbourhood income quintile) and urban or rural  
33  
34 residence was determined by linking each decedent's residential postal code at the  
35  
36 time of death to the Statistics Canada 2006 census. Cause of death was determined  
37  
38 from the ORGD database and classified based on the International Classification of  
39  
40 Diseases 10<sup>th</sup> Revision (ICD-10). A primary chronic condition was defined as a nine-  
41  
42 level variable indicating the presence of cancer, chronic obstructive pulmonary  
43  
44 disease (COPD), coronary artery disease (CAD), congestive heart failure (CHF),  
45  
46 peripheral vascular disease (PVD), severe liver disease, diabetes with end organ  
47  
48 failure, renal failure or dementia.<sup>18</sup> Decedents were assigned to one of these  
49  
50 conditions based on the ICD-10 diagnostic codes during his/or her last  
51  
52  
53  
54  
55  
56  
57  
58  
59  
60

1  
2  
3 hospitalization, which was available for over 90% of decedents. When multiple  
4  
5 chronic conditions were identified the following hierarchy was applied: most  
6  
7 responsible diagnosis, then co-morbid diagnoses, then minor diagnoses. For each  
8  
9 LHIN, we determined the number of acute care beds per 100,000 population and  
10  
11 calculated the median bed capacity for the province over the study period. We  
12  
13 classified LHINs falling below and above the provincial median acute care beds as  
14  
15 “low acute care bed capacity” and “high acute care bed capacity”, respectively, and  
16  
17 categorized decedents according to the acute care bed capacity of their LHIN.  
18  
19  
20  
21  
22  
23

### 24 *Statistical Analyses*

25  
26 We used descriptive statistics to characterize health services use and location of  
27  
28 death for all decedents and according to groups defined by age, chronic condition,  
29  
30 and year of death. Categorical and continuous variables were summarized as  
31  
32 proportions and means (standard deviation, SD) or medians (interquartile range,  
33  
34 IQR), respectively. Student’s t-test was used to compare continuous data and the  
35  
36 Chi-square test was used for comparison of categorical data. We used the Cochran-  
37  
38 Armitage trend test and linear regression, as appropriate, to examine changes over  
39  
40 time in location of death and costs. Multilevel logistic regression, accounting for the  
41  
42 clustering of decedents within LHINs, was used to identify factors associated with  
43  
44 dying in hospital. Putative factors were considered based on their clinical relevance  
45  
46 and availability in the dataset. At the patient-level this included age, sex, Charlson  
47  
48 comorbidity score, rural residence, income, year and cause of death. LHIN acute  
49  
50 care bed capacity was included as a cluster-level factor.  
51  
52  
53  
54  
55  
56  
57  
58  
59  
60

## Ethics

This study was approved by the institutional review board at Sunnybrook Health Sciences Centre, Toronto, Canada.

## Results

### *Patterns and Temporal Trends in Place of Death and Palliative care Use*

There were 962,462 decedents in Ontario between fiscal 2004 and 2014. Mean (SD) age at death was 76.3 (14.8) years and 50.1% were women (Table 1). Overall, 45% of decedents died in hospital. Fewer individuals died in hospital over time, (45.9% in 2004 to 43.2% in 2014; absolute difference (95% confidence interval) 2.7% (2.3%, 3.2%), test for trend  $p < 0.001$ , Figure 1), with a corresponding increase in deaths at home (37.9% to 43.2%; absolute difference 5.3% (4.9%, 5.8%), test for trend  $p < 0.001$ , Figure 1). Patterns in place of death varied based on primary chronic condition, with those with liver disease (73.3%), peripheral vascular disease (67.5%), congestive heart failure (61.1%), COPD (60.8%), coronary artery disease (57.7%), and cancer (54%) more likely to die in hospital than those with dementia (34.2%) (Supplemental Figure 1,  $\chi^2 p < 0.001$ ).

There was a two-fold increase in the proportion of decedents who received palliative care during the terminal hospital admission; from 14.0% in 2004 to 29.3% in 2014 (absolute difference 15.3% (14.9%, 15.7%),  $p < 0.001$ , Figure 1). Decedents with cancer had the highest rates of palliative care during the terminal hospitalization

1  
2  
3 throughout the study (37.9% in 2004 to 44% in 2014, (absolute difference 6.1%  
4 (5.2%, 7.1%),  $p < 0.001$ ), but increased uptake of palliative care was observed for all  
5 conditions, including patients with dementia (7.9% in 2004 to 23.7% in 2014,  
6 absolute difference 15.8% (14.7%, 16.8),  $p < 0.001$ ), coronary artery disease (7.6%  
7 in 2004 to 25.6% in 2014, absolute difference 18.0% (16.4%, 19.6%),  $p < 0.001$ ), and  
8 congestive heart failure (10.3% in 2004 to 35.3% in 2014, absolute difference 25.0%  
9 (24.0%, 26.2%),  $p < 0.001$ ) (Supplemental Figure 1). Restricting to decedents dying  
10 in hospital, receipt of palliative care during the terminal hospital admission increased  
11 significantly, from 30.5% in 2004 to 67.9% in 2014, (absolute difference 37.4%  
12 (36.8%, 38.1%),  $p < 0.001$ ). Similar increases were observed among chronic  
13 conditions, with decedents with cancer having amongst the highest rates of palliative  
14 care during the terminal hospital admission (Supplemental Figure 2).

15  
16  
17  
18  
19  
20  
21  
22  
23  
24  
25  
26  
27  
28  
29  
30  
31  
32  
33 In the adjusted analysis, men and older decedents were more likely to die in hospital  
34 than out of hospital (Table 2), with the association between age and death in hospital  
35 attenuating among those 85 years and older. In addition, those residing in more rural  
36 areas (OR 1.12, 95% CI 1.11 to 1.13) and neighbourhoods with the lowest  
37 (compared to the highest) income quintile (OR 1.13, 95% CI 1.12 to 1.14) had higher  
38 odds of dying in hospital. There was a trend towards increased odds of in-hospital  
39 deaths amongst decedents living in a high acute bed capacity LHIN; however, this  
40 was not statistically significant (Table 2).  
41  
42  
43  
44  
45  
46  
47  
48  
49  
50  
51  
52  
53  
54  
55  
56  
57  
58  
59  
60

### *Decedents' Use of Health Resources – Last 6-months of Life*

The majority of decedents visited the emergency department (77.3%) and saw ten or more physicians (52.6%) during the last 6-months of life (Table 3). In the same period, 68.4% were hospitalized one or more times (median hospitalizations (interquartile range (IQR)) 1(0, 2)) and approximately one in every five decedents were admitted to an ICU and 13.9% received mechanical ventilation. Decedents spent a median of 6 (0, 19) days in hospital during the last 6-months of life. Over the 11-year period, there was no substantial change in proportion of decedents being admitted to hospital, ICU or using emergency department services in the last six months of life. There was, however, an increasing trend in the proportions of decedents seeing 10 or more physicians and in receiving mechanical ventilation in the 6-months prior to death (Table 3). Rates of health services use during the last 6-months of life were highest amongst decedents who died in hospital, including a higher proportion of admissions to ICU (36.2% vs 5.6%,  $p < 0.001$ ) and receipt of mechanical ventilation (27.7% vs 2.6%,  $p < 0.001$ ). Among individuals who died in hospital, rates of use of these high intensity resources (ICU and mechanical ventilation) were lower among those who received palliative care within the last 6-months of life (Table 4). Compared to decedents with a chronic organ failure-related condition (for example COPD, CHF) those with cancer and dementia were less likely to be admitted to ICU and less likely to receive mechanical ventilation (Supplemental Table 1). Approximately 1 in every 2 decedents received palliative care services during the last six months of life, with use of these services increasing significantly over the study period (from 28.1% in 2004 to 57.7% in 2014, absolute difference

1  
2  
3 29.6% (29.2%, 30.1%),  $p < 0.001$ ) (Figure 2). Receipt of palliative care during the last  
4  
5 6-months of life was highest amongst decedents dying in a long-term care facility  
6  
7 across all years, ranging from 61.9% in 2004 to 88.3% in 2014, absolute difference  
8  
9 26.4% (25.1%, 27.8%),  $p < 0.001$  (Figure 2).  
10  
11  
12  
13

#### 14 *Healthcare Costs in the last 6 months of life*

15  
16  
17 The median (IQR) total health care costs in the last 6-months of life were highest  
18  
19 amongst decedents who died in hospital (\$32,291 (\$18,245, \$55,308)) compared to  
20  
21 those who did not (\$22,895 (\$7,636, \$36,931)) (Supplemental Table 2). Overall, the  
22  
23 majority of non-patient borne healthcare costs were attributed to inpatient costs,  
24  
25 which ranged from a median of \$0 (\$0, \$11,060) amongst decedents who died in  
26  
27 settings other than a hospital to \$16,284 (\$7,290, \$33,216) amongst those dying in  
28  
29 hospital.  
30  
31  
32  
33  
34

#### 35 **Interpretation**

36  
37 In this population-based study, we found substantial healthcare utilization among  
38  
39 decedents in the 6-months prior to death. We found that three in every four  
40  
41 decedents were admitted to a hospital or emergency department; nearly one-half of  
42  
43 all deaths occurred in hospital; and one-quarter of these deaths occurred in the ICU.  
44  
45 Between 2004 and 2014, deaths in hospital decreased, with concomitant increases  
46  
47 in the proportion of terminal hospitalizations involving palliative care and deaths at  
48  
49 home; however, other markers of acute care and hospital-based healthcare resource  
50  
51 use have not changed.  
52  
53  
54  
55  
56  
57  
58  
59  
60

1  
2  
3  
4  
5 Similar to others,<sup>1-3, 19, 20</sup> we have demonstrated considerable acute care healthcare  
6 resource use at or near the time of death. Overall, these findings suggest a  
7  
8 continued reliance on hospitals to provide end-of-life care services, and underscore  
9  
10 the gaps in options for palliative, hospice or home-based care at the end of life within  
11  
12 the Canadian health system.<sup>7, 8, 21</sup> A lack of outpatient structures and processes for  
13  
14 delivering end-of-life services may therefore be an explanation for the observed  
15  
16 utilization patterns, especially so in more rural and remote areas. For example,  
17  
18 compared to the United States, which has more available hospice services,<sup>22</sup> Ontario  
19  
20 has over twice as many deaths occurring in hospital.<sup>1</sup> The observed trend towards  
21  
22 increased in-hospital deaths among individuals living in LHINs with a higher number  
23  
24 of acute care beds, support a role for differential availability of institutional services in  
25  
26 the delivery of end-of-life care. Future studies that clarify the contributions of  
27  
28 system-level factors, such as availability of institutional- and community- based  
29  
30 resources (including in-home palliative care services) on where individuals die are  
31  
32 warranted.  
33  
34  
35  
36  
37  
38  
39  
40  
41

42 Our study did find modest changes in end-of-life care practices over time, notably  
43  
44 decreasing rates of hospital deaths. From 1980 to 1997, over 66% of Ontarians died  
45  
46 in hospital, with relatively stable rates over this time.<sup>23</sup> However, between 1997 and  
47  
48 2004, there was a substantial drop in deaths occurring in hospital - from 66% to  
49  
50 45%. This may have been related to significant health restructuring efforts that  
51  
52 occurred in Ontario that resulted in the closure of thousands of hospital beds and the  
53  
54  
55  
56  
57  
58  
59  
60

1  
2  
3 creation of new long-term care beds.<sup>24</sup> While we cannot confirm the number of  
4  
5 deaths in hospital-based hospice or palliative care units in the present study, a  
6  
7 substantial proportion of decedents dying in an acute care institution still do not  
8  
9 receive palliative care, suggesting additional avenues are required to improve  
10  
11 access to less aggressive end-of-life care. In particular, future studies to understand  
12  
13 the determinants of the observed lower rates of in-hospital deaths amongst  
14  
15 individuals with dementia, compared to other chronic conditions, and the extent to  
16  
17 which this may reflect improved care at the end of life for these individuals are  
18  
19 warranted. Notwithstanding, our estimate that 46.1% of decedents received some  
20  
21 form of palliative care in the last six months of life is generally similar to recent  
22  
23 observations using comparable methods.<sup>17, 25</sup> We extend these findings by providing  
24  
25 evidence of increasing trends in the receipt of palliative care at the population level.  
26  
27  
28 Contributing factors to the observed rise in palliative care use among these  
29  
30 decedents likely include the increasing recognition of the benefits of palliative care  
31  
32 for improving care at the end of life and the growth of palliative care services in the  
33  
34 last decade.<sup>26-30</sup> It is also plausible that shifting awareness regarding palliative care  
35  
36 services among dying individuals and their caregivers might have influenced end-of-  
37  
38 life care decisions. With population aging and increasing number of older adults  
39  
40 living with chronic and terminal diseases, understanding the drivers of the observed  
41  
42 increase will be informative to efforts targeted at meeting the palliative care needs of  
43  
44 these individuals.  
45  
46  
47  
48  
49  
50  
51  
52  
53  
54  
55  
56  
57  
58  
59  
60



1  
2  
3 Receipt of in-patient and technology laden end-of-life care may not align with  
4 patients' preferences,<sup>4, 31, 32</sup> and is costly.<sup>20, 33</sup> Our finding that individuals dying in  
5 hospital had higher costs of care in the last 6-months of life and that approximately  
6 50% of these were attributable to inpatient costs align with previous data from  
7 Ontario,<sup>33</sup> and suggest that there may be opportunities to improve end-of-life care  
8 that is better aligned with patient wishes. In particular, the observed higher risk of  
9 dying in hospital among individuals from rural residences and lower income  
10 neighbourhoods may be indicative of disparities in access to end-of-life care  
11 services, including availability of home-, palliative-, and hospice- care. Further,  
12 although our data is unable to provide insights regarding the appropriateness of  
13 care, the observation that a large proportion of decedents received care from  
14 multiple physicians within the last 6-months of life, is suggestive of fragmented care.  
15 This has important implications not only for the quality of care provided to these  
16 individuals but may also adversely impact healthcare costs.<sup>34</sup> Investigations  
17 delineating the reasons for these observations may be instructive to health policies  
18 and efforts to organize and deliver end-of-life care that meet the needs of these  
19 individuals, including improving access to services that support individuals dying at  
20 home.

21  
22  
23  
24  
25  
26  
27  
28  
29  
30  
31  
32  
33  
34  
35  
36  
37  
38  
39  
40  
41  
42  
43  
44  
45  
46  
47 While ascribing cause of death and associating this cause of death with specific end-  
48 of-life preferences is challenging,<sup>35</sup> our findings suggest important differences in care  
49 based upon predominant terminal clinical diagnoses. There were higher rates of ICU  
50 admission, receipt of mechanical ventilation in the period before death, and hospital-  
51  
52  
53  
54  
55  
56  
57  
58  
59  
60

1  
2  
3 based deaths among those with organ failure (e.g. congestive heart failure, chronic  
4 obstructive pulmonary disease, coronary artery disease, liver failure, renal failure) as  
5 compared to patients with cancer or dementia. This finding has implication for  
6  
7  
8 planning health services, supporting individuals dying from these conditions, and  
9  
10 potentially supporting sub-specialist clinicians treating those conditions. Having  
11  
12 greater options for end-of-life and palliative care at home or in hospice may increase  
13  
14  
15 quality-adjusted-life-days, and reduce both hospitalization rates and overall costs.<sup>19,</sup>  
16  
17  
18  
19 36-38

## 20 21 22 23 24 **Limitations**

25  
26 Our population-based observational study describes associations but cannot explain  
27  
28 the causes for high rates of healthcare utilization near the end-of-life. In particular,  
29  
30 we lacked information on several factors previously shown to be associated with use  
31  
32 of healthcare services, for example patient and family preferences, provider decision  
33  
34 making, and potentially, differential availability of hospice and palliative care services  
35  
36 across various patient populations and geographies.<sup>19, 39-41</sup> Our cost analyses does  
37  
38 not include all single public payer health system costs, including for example health  
39  
40 services provided at the community level. These may have important influences on  
41  
42 decisions with respect to location of death. Further, we report costs from the health  
43  
44 system payer perspective and therefore not all societal costs, including out-of-pocket  
45  
46 expenses and informal care costs, are considered. These costs may vary by chronic  
47  
48 condition<sup>42</sup> and can be a substantial burden on patients and informal care  
49  
50  
51  
52  
53  
54 providers.<sup>42, 43</sup> It is also plausible that changes in coding practices over time might  
55  
56  
57  
58  
59  
60

1  
2  
3 have impacted our report estimates. However, given the relatively short duration of  
4  
5 our study and the lack of sharp spikes in year-to-year trends, we believe this would  
6  
7 have minimal impact on our results and the conclusions drawn. Additionally, our  
8  
9 population-based focus, inclusion of a wide range of health sectors and emphasis on  
10  
11 temporal trends in estimates of health services use by decedents are key strengths  
12  
13 of our study.  
14  
15  
16  
17  
18

## 19 **Conclusion**

20  
21 In this population-based study, while there are slightly decreasing rates of deaths in-  
22  
23 hospital, and a corresponding increase in the provision of palliative care, the  
24  
25 Canadian health system remains reliant on hospitals to provide end-of-life care.  
26  
27 Approximately three-quarters of decedents were admitted to hospital and one in five  
28  
29 were admitted to ICU during the last 6-months of life, with rates remaining stable  
30  
31 over time. Rates of hospitalization prior to death were higher for those living in more  
32  
33 rural and economically disadvantaged neighbourhoods. Care in hospital appears to  
34  
35 be more costly than home-based alternatives. Increased capacity for palliative,  
36  
37 hospice and home care at the end-of-life may help to better align health system  
38  
39 resources with patient preferences.  
40  
41  
42  
43  
44  
45  
46  
47  
48  
49  
50  
51  
52  
53  
54  
55  
56  
57  
58  
59  
60

### **Author Contribution**

All authors contributed to the conceptualization of this manuscript, including the design or analysis and interpretation of the data, drafting the article, and revising the manuscript for important intellectual content. All authors gave final approval of the version to be published, and agree to act as guarantors of the work.

Confidential

## Acknowledgement

This study was supported by the Institute for Clinical Evaluative Sciences (ICES), which is funded by an annual grant from the Ontario Ministry of Health and Long-Term Care (MOHLTC). The opinions, results and conclusions reported in this paper are those of the authors and are independent from the funding sources. No endorsement by ICES or the Ontario MOHLTC is intended or should be inferred. Parts of this material are based on data and/or information compiled and provided by CIHI. However, the analyses, conclusions, opinions and statements expressed in the material are those of the author(s), and not necessarily those of CIHI. The study was also supported by a grant from the National Institute on Aging (U.S. National Institutes of Health) P01-AG019783.

## References

1. Bekelman JE, Halpern SD, Blankart CR, Bynum JP, Cohen J, Fowler R, et al. Comparison of Site of Death, Health Care Utilization, and Hospital Expenditures for Patients Dying With Cancer in 7 Developed Countries. *JAMA*. 2016;315(3):272-83.
2. Pivodic L, Pardon K, Morin L, Addington-Hall J, Miccinesi G, Cardenas-Turanzas M, et al. Place of death in the population dying from diseases indicative of palliative care need: a cross-national population-level study in 14 countries. *J Epidemiol Community Health*. 2016;70(1):17-24.
3. Cohen J, Pivodic L, Miccinesi G, Onwuteaka-Philipsen BD, Naylor WA, Wilson DM, et al. International study of the place of death of people with cancer: a population-level comparison of 14 countries across 4 continents using death certificate data. *Br J Cancer*. 2015;113(9):1397-404.
4. Gomes B, Calanzani N, Gysels M, Hall S, Higginson IJ. Heterogeneity and changes in preferences for dying at home: a systematic review. *BMC Palliat Care*. 2013;12:7.
5. Gomes B, Higginson IJ, Calanzani N, Cohen J, Deliens L, Daveson BA, et al. Preferences for place of death if faced with advanced cancer: a population survey in England, Flanders, Germany, Italy, the Netherlands, Portugal and Spain. *Ann Oncol*. 2012;23(8):2006-15.
6. Heyland DK, Barwich D, Pichora D, Dodek P, Lamontagne F, You JJ, et al. Failure to engage hospitalized elderly patients and their families in advance care planning. *JAMA Intern Med*. 2013;173(9):778-87.
7. Carstairs S, Beaudoin G. Subcommittee to update "Of Life and Death" of the Standing Senate Committee on Social Affairs, Science and Technology. Quality end-of-life care: the right of every Canadian. Final report 2000 [Available from: <https://sencanada.ca/content/sen/committee/362/upda/rep/repfinjun00-e.htm>].
8. Schuklenk U, van Delden JJ, Downie J, McLean SA, Upshur R, Weinstock D. End-of-life decision-making in Canada: the report by the Royal Society of Canada expert panel on end-of-life decision-making. *Bioethics*. 2011;25 Suppl 1:1-73.
9. Wilson DM, Truman CD, Thomas R, Fainsinger R, Kovacs-Burns K, Froggatt K, et al. The rapidly changing location of death in Canada, 1994-2004. *Soc Sci Med*. 2009;68(10):1752-8.
10. Gomes B, Calanzani N, Higginson IJ. Reversal of the British trends in place of death: time series analysis 2004-2010. *Palliat Med*. 2012;26(2):102-7.
11. Mai TTX, Lee E, Cho H, Chang YJ. Increasing Trend in Hospital Deaths Consistent among Older Decedents in Korea: A Population-based Study Using Death Registration Database, 2001-2014. *BMC Palliat Care*. 2018;17(1):16.
12. Sarmiento VP, Higginson IJ, Ferreira PL, Gomes B. Past trends and projections of hospital deaths to inform the integration of palliative care in one of the most ageing countries in the world. *Palliat Med*. 2016;30(4):363-73.
13. Wodchis WP, Bushmenev K, Nikitovic M, McKillop I. Guidelines on Person-Level Costing Using Administrative Databases in Ontario [Internet]. 2013 [cited May 23, 2018]. Available from: [http://www.hsprn.ca/uploads/files/Guidelines\\_on\\_PersonLevel\\_Costing\\_May\\_2013.pdf](http://www.hsprn.ca/uploads/files/Guidelines_on_PersonLevel_Costing_May_2013.pdf).

14. Wodchis WP, Austin PC, Henry DA. A 3-year study of high-cost users of health care. *Cmaj*. 2016;188(3):182-8.
15. Garland A, Yogendran M, Olafson K, Scales DC, McGowan KL, Fransoo R. The accuracy of administrative data for identifying the presence and timing of admission to intensive care units in a Canadian province. *Med Care*. 2012;50(3):e1-6.
16. Scales DC, Guan J, Martin CM, Redelmeier DA. Administrative data accurately identified intensive care unit admissions in Ontario. *J Clin Epidemiol*. 2006;59(8):802-7.
17. Tanuseputro P, Budhwani S, Bai YQ, Wodchis WP. Palliative care delivery across health sectors: A population-level observational study. *Palliat Med*. 2017;31(3):247-57.
18. Iezzoni LI, Heeren T, Foley SM, Daley J, Hughes J, Coffman GA. Chronic conditions and risk of in-hospital death. *Health Serv Res*. 1994;29(4):435-60.
19. Seow H, Sutradhar R, McGrail K, Fassbender K, Pataky R, Lawson B, et al. End-of-Life Cancer Care: Temporal Association between Homecare Nursing and Hospitalizations. *J Palliat Med*. 2016;19(3):263-70.
20. Fassbender K, Fainsinger RL, Carson M, Finegan BA. Cost trajectories at the end of life: the Canadian experience. *J Pain Symptom Manage*. 2009;38(1):75-80.
21. Office of the Auditor General of Ontario. Annual Report (2016): Volume 2. Chapter 1: Follow-Up Reports on 2014 Annual Report Value-for-Money Audits: Palliative Care. Page 98 -108 [Available from: [http://www.auditor.on.ca/en/content/annualreports/arreports/en16/v2\\_108en16.pdf](http://www.auditor.on.ca/en/content/annualreports/arreports/en16/v2_108en16.pdf)].
22. Medicare Payment Advisory Commission (MedPAC). Report to the congress. Medicare payment policy 2016 [Available from: <http://medpac.gov/docs/default-source/reports/march-2016-report-to-the-congress-medicare-payment-policy.pdf?sfvrsn=0>].
23. Heyland DK, Lavery JV, Tranmer JE, Shortt SED. The final days: An analysis of the dying experience in Ontario. *Ann R Coll Phys Surg Can*. 2000;33(6):356-61.
24. Sinclair D, Rochon M, Leatt P. Riding the Third Rail. The Story of Ontario's Health Services Restructuring Commission, 1996-2000. [Internet]. 2005 [cited February 27, 2017]. Available from: <http://irpp.org/research-studies/book-2005-08-15/>.
25. Seow H, O'Leary E, Perez R, Tanuseputro P. Access to palliative care by disease trajectory: a population-based cohort of Ontario decedents. *BMJ Open*. 2018;8(4):e021147.
26. Lynch T, Connor S, Clark D. Mapping levels of palliative care development: a global update. *J Pain Symptom Manage*. 2013;45(6):1094-106.
27. Advancing high quality, high value palliative care in Ontario: a declaration of partnership and commitment to action. [Internet]. 2011 [cited November 1, 2017]. Available from: [http://health.gov.on.ca/en/public/programs/ltc/docs/palliative%20care\\_report.pdf](http://health.gov.on.ca/en/public/programs/ltc/docs/palliative%20care_report.pdf).
28. Sutradhar R, Barbera L, Seow HY. Palliative homecare is associated with reduced high- and low-acuity emergency department visits at the end of life: A population-based cohort study of cancer decedents. *Palliat Med*. 2017;31(5):448-55.

- 1  
2  
3  
4  
5  
6  
7  
8  
9  
10  
11  
12  
13  
14  
15  
16  
17  
18  
19  
20  
21  
22  
23  
24  
25  
26  
27  
28  
29  
30  
31  
32  
33  
34  
35  
36  
37  
38  
39  
40  
41  
42  
43  
44  
45  
46  
47  
48  
49  
50  
51  
52  
53  
54  
55  
56  
57  
58  
59  
60
29. Seow H, Brazil K, Sussman J, Pereira J, Marshall D, Austin PC, et al. Impact of community based, specialist palliative care teams on hospitalisations and emergency department visits late in life and hospital deaths: a pooled analysis. *Bmj*. 2014;348:g3496.
  30. Dumanovsky T, Augustin R, Rogers M, Lettang K, Meier DE, Morrison RS. The Growth of Palliative Care in U.S. Hospitals: A Status Report. *J Palliat Med*. 2016;19(1):8-15.
  31. Higginson IJ, Sen-Gupta GJ. Place of care in advanced cancer: a qualitative systematic literature review of patient preferences. *J Palliat Med*. 2000;3(3):287-300.
  32. Shih CY, Hu WY, Cheng SY, Yao CA, Chen CY, Lin YC, et al. Patient Preferences versus Family Physicians' Perceptions Regarding the Place of End-of-Life Care and Death: A Nationwide Study in Taiwan. *J Palliat Med*. 2015;18(7):625-30.
  33. Tanuseputro P, Wodchis WP, Fowler R, Walker P, Bai YQ, Bronskill SE, et al. The health care cost of dying: a population-based retrospective cohort study of the last year of life in Ontario, Canada. *PLoS One*. 2015;10(3):e0121759.
  34. Wodchis WP, Arthurs E, Khan AI, Gandhi S, MacKinnon M, Sussman J. Cost trajectories for cancer patients. *Curr Oncol*. 2016;23(Suppl 1):S64-75.
  35. Bach PB, Schrag D, Begg CB. Resurrecting treatment histories of dead patients: a study design that should be laid to rest. *JAMA*. 2004;292(22):2765-70.
  36. Phan Pham B, Krahn M. End-of-life care interventions: an economic analysis. 2014 [14(8):1-70 ]. Available from: <http://www.hqontario.ca/evidence/publications-and-ohtac-recommendations/ontario-health-technology-assessment-series/eol-econ-interventions>.
  37. Seow H, Pataky R, Lawson B, O'Leary EM, Sutradhar R, Fassbender K, et al. Temporal association between home nursing and hospital costs at end of life in three provinces. *Curr Oncol*. 2016;23(Suppl 1):S42-51.
  38. Zimmermann C, Swami N, Krzyzanowska M, Hannon B, Leigh N, Oza A, et al. Early palliative care for patients with advanced cancer: a cluster-randomised controlled trial. *Lancet*. 2014;383(9930):1721-30.
  39. Hart JL, Harhay MO, Gabler NB, Ratcliffe SJ, Quill CM, Halpern SD. Variability Among US Intensive Care Units in Managing the Care of Patients Admitted With Preexisting Limits on Life-Sustaining Therapies. *JAMA Intern Med*. 2015;175(6):1019-26.
  40. Obermeyer Z, Powers BW, Makar M, Keating NL, Cutler DM. Physician Characteristics Strongly Predict Patient Enrollment In Hospice. *Health Aff (Millwood)*. 2015;34(6):993-1000.
  41. Kelley AS, Ettner SL, Morrison RS, Du Q, Wenger NS, Sarkisian CA. Determinants of medical expenditures in the last 6 months of life. *Ann Intern Med*. 2011;154(4):235-42.
  42. Kelley AS, McGarry K, Gorges R, Skinner JS. The burden of health care costs for patients with dementia in the last 5 years of life. *Ann Intern Med*. 2015;163(10):729-36.
  43. Chai H, Guerriere DN, Zagorski B, Coyte PC. The magnitude, share and determinants of unpaid care costs for home-based palliative care service provision in Toronto, Canada. *Health Soc Care Community*. 2014;22(1):30-9.



1  
2  
3  
4  
5  
6  
7  
8  
9  
10  
11  
12  
13  
14  
15  
16  
17  
18  
19  
20  
21  
22  
23  
24  
25  
26  
27  
28  
29  
30  
31  
32  
33  
34  
35  
36  
37  
38  
39  
40  
41  
42  
43  
44  
45  
46  
47  
48  
49  
50  
51  
52  
53  
54  
55  
56  
57  
58  
59  
60

Confidential

Figure 1: Temporal trends in location of death: Ontario 2004 – 2014

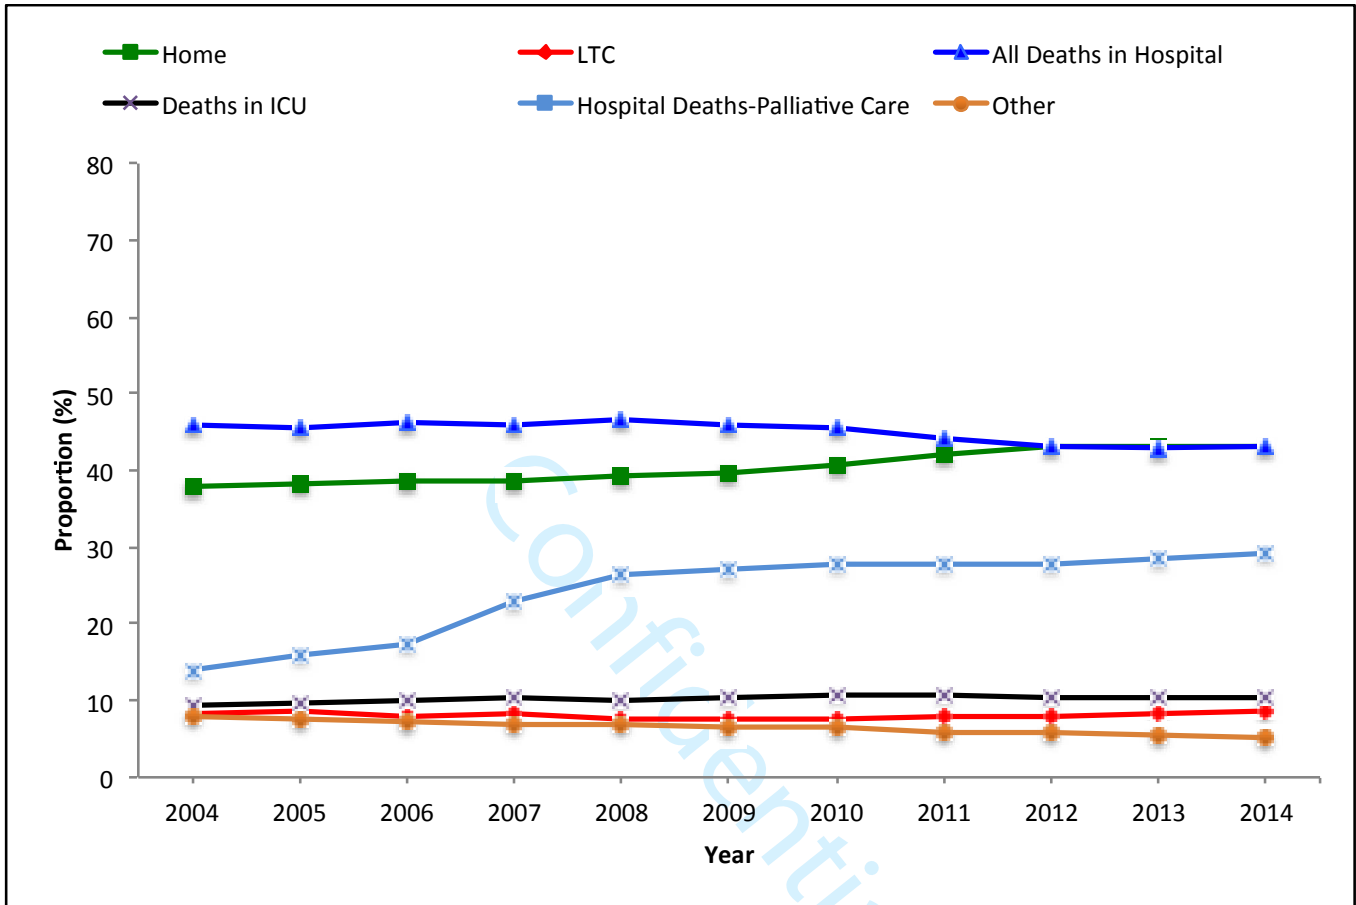

1  
2  
3  
4  
5  
6  
7  
8  
9  
10  
11  
12  
13  
14  
15  
16  
17  
18  
19  
20  
21  
22  
23  
24  
25  
26  
27  
28  
29  
30  
31  
32  
33  
34  
35  
36  
37  
38  
39  
40  
41  
42  
43  
44  
45  
46  
47  
48  
49  
50  
51  
52  
53  
54  
55  
56  
57  
58  
59  
60

Figure 2: Trends in proportion of patients receiving palliative care in the last six months of life: overall and by location of death

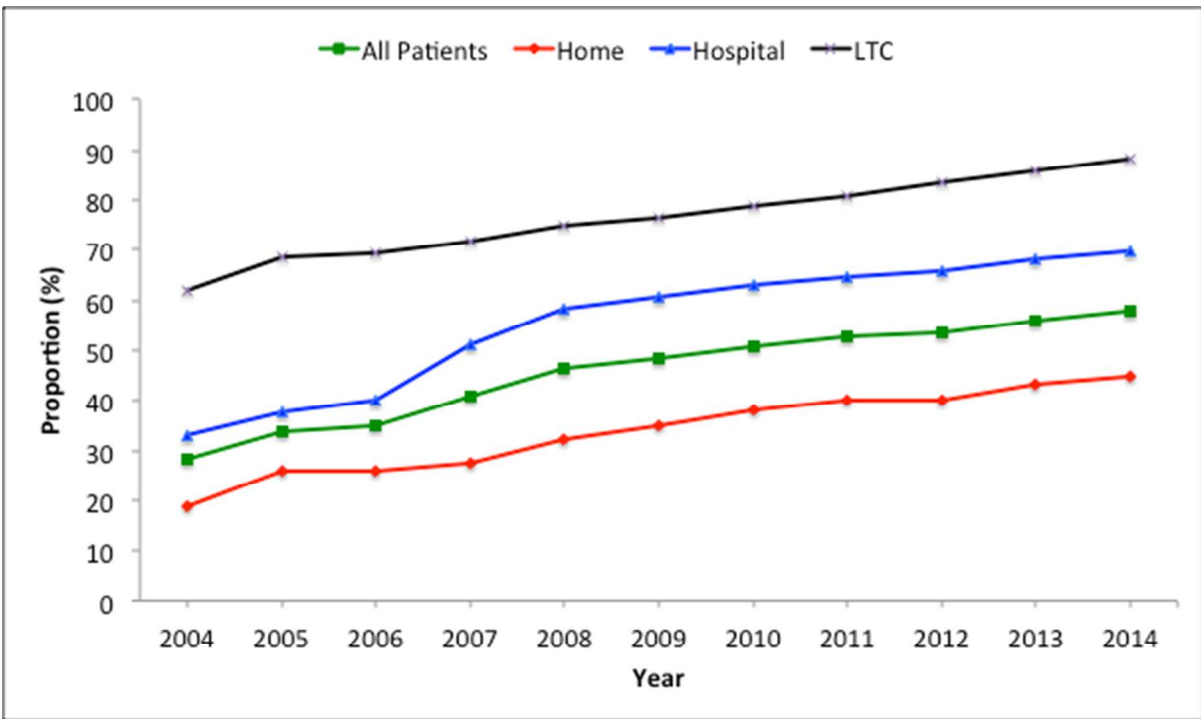

Table 1: Demographics of Ontario Decedents, 2004 – 2014\*

|                                             | All Decedents<br>(N=962,462) | Death in<br>Hospital<br>(N=433,074) | Death Out of<br>Hospital<br>(N=529,388) |
|---------------------------------------------|------------------------------|-------------------------------------|-----------------------------------------|
| <b>Age at death (Mean, SD)</b>              | 76.3 (14.8)                  | 75.8 (13.5)                         | 76.6 (15.8)                             |
| <b>Age category (%)</b>                     |                              |                                     |                                         |
| 18 - 49 years                               | 5.8                          | 4.6                                 | 6.8                                     |
| 50 - 54 years                               | 3.4                          | 3.3                                 | 3.5                                     |
| 55 - 59 years                               | 4.7                          | 4.7                                 | 4.6                                     |
| 60 - 64 years                               | 6.0                          | 6.4                                 | 5.6                                     |
| 65 - 69 years                               | 7.4                          | 8.3                                 | 6.6                                     |
| 70 -74 years                                | 9.5                          | 11.0                                | 8.3                                     |
| 75 - 79 years                               | 12.8                         | 14.7                                | 11.4                                    |
| 80 - 84 years                               | 16.6                         | 17.9                                | 15.6                                    |
| ≥85 years                                   | 33.7                         | 28.9                                | 37.6                                    |
| <b>Female (%)</b>                           | 50.1                         | 48.0                                | 51.9                                    |
| <b>Charlson comorbidity index score (%)</b> |                              |                                     |                                         |
| 0                                           | 14.1                         | 6.5                                 | 20.4                                    |
| 1                                           | 13.9                         | 14.3                                | 13.5                                    |
| ≥ 2                                         | 61.7                         | 79.2                                | 47.3                                    |
| Missing                                     | 10.3                         | –                                   | 18.7                                    |
| <b>Income quintile** (%)</b>                |                              |                                     |                                         |
| 1 (Lowest)                                  | 23.5                         | 23.8                                | 23.3                                    |
| 2                                           | 21.1                         | 21.9                                | 20.4                                    |
| 3                                           | 19.1                         | 19.2                                | 19.0                                    |
| 4                                           | 18.5                         | 18.2                                | 18.8                                    |
| 5 (Highest)                                 | 17.8                         | 16.9                                | 18.5                                    |
| <b>Location of residence** (%)</b>          |                              |                                     |                                         |
| Rural                                       | 14.8                         | 15.3                                | 14.5                                    |
| <b>Chronic conditions (%)</b>               |                              |                                     |                                         |
| Cancer                                      | 20.3                         | 24.4                                | 17.0                                    |
| Congestive heart failure                    | 11.5                         | 15.6                                | 8.1                                     |
| Dementia                                    | 9.0                          | 6.9                                 | 10.8                                    |
| Chronic obstructive pulmonary disease       | 5.1                          | 6.9                                 | 3.6                                     |
| Coronary artery disease                     | 4.7                          | 6.1                                 | 3.6                                     |
| Renal failure                               | 3.0                          | 4.1                                 | 2.1                                     |
| Severe liver disease                        | 1.5                          | 2.5                                 | 0.7                                     |
| Peripheral vascular disease                 | 1.0                          | 1.5                                 | 0.6                                     |
| Diabetes with end organ damage              | 0.1                          | 0.1                                 | 0.1                                     |
| None                                        | 43.8                         | 32.1                                | 53.3                                    |

Table 1 (cont'd): Demographics of Ontario Decedents, 2004 – 2014\*

|                                    | All Decedents<br>(N=962,426) | Death in<br>Hospital<br>(N=433,090) | Death Out of<br>Hospital#<br>(N=529,336) |
|------------------------------------|------------------------------|-------------------------------------|------------------------------------------|
| <b>Cause of death (top 20)</b>     |                              |                                     |                                          |
| Ischemic heart disease             | 13.6                         | 9.9                                 | 16.7                                     |
| Cancer                             |                              |                                     |                                          |
| Lung                               | 6.2                          | 7.1                                 | 5.5                                      |
| Colorectal                         | 3.0                          | 3.0                                 | 2.9                                      |
| Hematological                      | 2.5                          | 3.5                                 | 1.6                                      |
| Breast                             | 1.8                          | 1.8                                 | 1.8                                      |
| Prostate                           | 1.4                          | 1.2                                 | 1.5                                      |
| Pancreas                           | 1.4                          | 1.4                                 | 1.4                                      |
| Dementia and Alzheimer's disease   | 5.9                          | 2.5                                 | 8.7                                      |
| Cerebrovascular diseases           | 5.1                          | 6.0                                 | 4.3                                      |
| Chronic lower respiratory diseases | 3.5                          | 4.1                                 | 3.0                                      |
| Diabetes                           | 2.8                          | 2.2                                 | 3.4                                      |
| Influenza and pneumonia            | 2.2                          | 3.0                                 | 1.5                                      |
| Diseases of the urinary system     | 2.0                          | 2.8                                 | 1.3                                      |
| Falls                              | 1.6                          | 2.4                                 | 1.0                                      |
| Heart failure and complications    | 1.6                          | 1.7                                 | 1.5                                      |
| Cirrhosis and other liver diseases | 1.2                          | 1.9                                 | 0.7                                      |
| Hypertensive disease               | 1.0                          | 0.6                                 | 1.4                                      |
| Intentional self harm              | 1.0                          | 0.2                                 | 1.6                                      |
| Cardiac arrhythmias                | 1.0                          | 1.2                                 | 0.8                                      |
| Sepsis                             | 0.9                          | 1.6                                 | 0.3                                      |

\*P < 0.05 for all comparisons by location of death

\*\* 0.5% (5,213) and 0.1% (617) of decedents had missing information on income and location of residence, respectively.

# Out of hospital deaths include dying at home (n=389,235); long-term care facility (n=77,228); and other (n=62,873).

Table 2: Multi-level model of factors associated with dying in hospital versus all other locations\*

|                                         | Odds Ratio and 95%<br>Confidence Limit |
|-----------------------------------------|----------------------------------------|
| <b>Patient Factors</b>                  |                                        |
| <b>Age category (%)</b>                 |                                        |
| 18 - 50 years                           | Reference                              |
| 50 - 54 years                           | 1.34 (1.30, 1.38)                      |
| 55 - 59 years                           | 1.47 (1.43, 1.51)                      |
| 60 - 64 years                           | 1.63 (1.59, 1.67)                      |
| 65 - 69 years                           | 1.80 (1.76, 1.84)                      |
| 70 - 74 years                           | 1.91 (1.86, 1.95)                      |
| 75 - 79 years                           | 1.89 (1.85, 1.93)                      |
| 80 - 84 years                           | 1.74 (1.70, 1.78)                      |
| ≥85 years                               | 1.22 (1.20, 1.25)                      |
| <b>Sex</b> (reference men)              | 0.88 (0.87, 0.89)                      |
| <b>Income quintile</b>                  |                                        |
| 1 (Lowest)                              | Reference                              |
| 2                                       | 1.02 (1.01, 1.04)                      |
| 3                                       | 0.96 (0.94, 0.97)                      |
| 4                                       | 0.92 (0.91, 0.93)                      |
| 5 (Highest)                             | 0.88 (0.88, 0.89)                      |
| <b>Rural residence</b> (reference no)   | 1.12 (1.11, 1.13)                      |
| <b>Cause of death</b>                   |                                        |
| Ischemic heart disease                  | Reference                              |
| Cancers                                 |                                        |
| Lung                                    | 2.00 (1.96, 2.04)                      |
| Colorectal                              | 1.71 (1.66, 1.75)                      |
| Hematological                           | 3.51 (3.41, 3.61)                      |
| Breast                                  | 1.79 (1.73, 1.85)                      |
| Prostate                                | 1.31 (1.26, 1.36)                      |
| Pancreas                                | 1.60 (1.54, 1.66)                      |
| Dementia and Alzheimer's disease        | 0.55 (0.54, 0.56)                      |
| Cerebrovascular diseases                | 2.48 (2.43, 2.53)                      |
| Chronic lower respiratory diseases      | 2.28 (2.22, 2.34)                      |
| Diabetes                                | 1.06 (1.03, 1.09)                      |
| Influenza and pneumonia                 | 3.72 (3.61, 3.83)                      |
| Diseases of the urinary system          | 3.84 (3.72, 3.97)                      |
| Falls                                   | 4.67 (4.50, 4.84)                      |
| Heart failure                           | 2.09 (2.02, 2.17)                      |
| Cirrhosis and other liver diseases      | 4.64 (4.45, 4.83)                      |
| Hypertensive disease                    | 0.82 (0.79, 0.86)                      |
| Intentional self harm                   | 0.19 (0.18, 0.21)                      |
| Cardiac arrhythmias                     | 2.94 (2.82, 3.07)                      |
| Sepsis                                  | 9.29 (8.78, 9.82)                      |
| <b>Year**</b>                           | 0.81 (0.79, 0.82)                      |
| <b>LHIN Factors</b>                     |                                        |
| Acute care bed capacity (reference low) | 1.02 (1.00, 1.05)                      |

\*Out of hospital deaths include dying at home (n=389,235); long-term care facility (n=77,228); and other (n=62,873); Dying in hospital n=433,090. Odds ratios for fiscal year reflect per 10-year unit change.

\*\* Per 10 year increase

For Peer Review Only

Table 3: Healthcare utilization in the last 6-months of life among all decedents

| Year       | Hospital Admission | Hospital Days    | ICU Admission | ICU Days*        | ED Visits   | Saw ≥10 Different Physicians | Mechanically Ventilated |
|------------|--------------------|------------------|---------------|------------------|-------------|------------------------------|-------------------------|
|            | (%)                | Median (IQR)     | (%)           | Mean (SD)        | (%)         | %                            | %                       |
| <b>All</b> | <b>68.4</b>        | <b>6 (0, 19)</b> | <b>19.4</b>   | <b>1.7 (6.5)</b> | <b>77.3</b> | <b>52.6</b>                  | <b>13.9</b>             |
| 2004       | 68.7               | 6 (0, 20)        | 19.1          | 1.5 (6.1)        | 76.4        | 44.8                         | 12.3                    |
| 2005       | 68.8               | 6 (0, 20)        | 19.2          | 1.6 (6.5)        | 77.1        | 45.9                         | 12.6                    |
| 2006       | 68.2               | 6 (0, 20)        | 19.1          | 1.6 (6.2)        | 77.1        | 48.7                         | 13.2                    |
| 2007       | 68.4               | 6 (0, 20)        | 19.3          | 1.6 (6.3)        | 77.2        | 51.3                         | 13.6                    |
| 2008       | 68.2               | 6 (0, 20)        | 18.6          | 1.6 (6.4)        | 77.0        | 52.2                         | 13.5                    |
| 2009       | 68.6               | 6 (0, 19)        | 19.5          | 1.7 (6.9)        | 77.2        | 53.8                         | 14.3                    |
| 2010       | 68.5               | 6 (0, 19)        | 19.2          | 1.7 (6.4)        | 77.6        | 54.8                         | 14.3                    |
| 2011       | 68.5               | 6 (0, 19)        | 19.5          | 1.8 (6.9)        | 77.7        | 55.7                         | 14.3                    |
| 2012       | 67.9               | 6 (0, 19)        | 19.7          | 1.7 (6.6)        | 77.2        | 55.1                         | 14.5                    |
| 2013       | 68.5               | 6 (0, 19)        | 20.1          | 1.8 (6.8)        | 77.7        | 57.1                         | 15.1                    |
| 2014       | 68.6               | 6 (0, 18)        | 19.9          | 1.8 (6.7)        | 77.9        | 57.5                         | 15.1                    |

\* Median ICU days is 0 for all years.

IQR – interquartile range; SD – standard deviation; ICU – Intensive Care Unit; ED – Emergency Department

Table 4: Healthcare utilization in the last 6-months of among individuals dying in hospital (n=433,074)

| Fiscal Year      | Hospital Admission (%)                                           |             | ED Visits (%) |             | Saw $\geq$ 10 Different Physicians (%) |             | ICU Admission (%) |             | Mechanical Ventilation (%) |             |
|------------------|------------------------------------------------------------------|-------------|---------------|-------------|----------------------------------------|-------------|-------------------|-------------|----------------------------|-------------|
|                  | Yes                                                              | No          | Yes           | No          | Yes                                    | No          | Yes               | No          | Yes                        | No          |
|                  | <b>Receipt of Palliative Care in the Last Six Months of Life</b> |             |               |             |                                        |             |                   |             |                            |             |
| <b>2004-2014</b> | <b>99.8</b>                                                      | <b>99.5</b> | <b>96.2</b>   | <b>96.0</b> | <b>76.9</b>                            | <b>66.7</b> | <b>26.6</b>       | <b>48.6</b> | <b>18.9</b>                | <b>38.9</b> |
| 2004             | 99.9                                                             | 99.9        | 93.2          | 95.6        | 69.3                                   | 58.4        | 16.5              | 44.5        | 8.2                        | 31.9        |
| 2005             | 99.9                                                             | 99.8        | 94.0          | 95.9        | 69.9                                   | 59.0        | 18.5              | 45.9        | 10.2                       | 33.8        |
| 2006             | 99.9                                                             | 99.8        | 94.8          | 96.1        | 72.9                                   | 64.5        | 19.7              | 45.6        | 11.2                       | 35.5        |
| 2007             | 99.9                                                             | 99.6        | 95.4          | 96.1        | 75.2                                   | 67.5        | 24.0              | 47.4        | 16.0                       | 37.5        |
| 2008             | 99.8                                                             | 99.4        | 95.9          | 95.9        | 75.8                                   | 68.0        | 25.0              | 46.8        | 18.1                       | 37.5        |
| 2009             | 99.8                                                             | 99.2        | 96.1          | 95.6        | 77.0                                   | 69.1        | 27.0              | 49.7        | 19.6                       | 41.1        |
| 2010             | 99.8                                                             | 99.1        | 96.6          | 95.7        | 77.7                                   | 70.7        | 27.1              | 50.6        | 19.9                       | 42.7        |
| 2011             | 99.8                                                             | 99.3        | 96.8          | 96.3        | 78.7                                   | 72.0        | 28.6              | 52.1        | 20.8                       | 43.6        |
| 2012             | 99.8                                                             | 99.3        | 97.2          | 96.2        | 78.9                                   | 71.6        | 30.2              | 52.5        | 21.9                       | 44.7        |
| 2013             | 99.8                                                             | 99.2        | 97.2          | 96.1        | 80.5                                   | 73.2        | 31.4              | 54.6        | 23.6                       | 46.9        |
| 2014             | 99.8                                                             | 99.2        | 97.3          | 96.4        | 80.6                                   | 73.3        | 31.5              | 53.8        | 24.2                       | 46.5        |

ICU – Intensive Care Unit; ED – Emergency Department



Supplemental Figure 1: Temporal trends in location of death stratified by chronic condition: Ontario 2004 –2014\*

**Cancer**

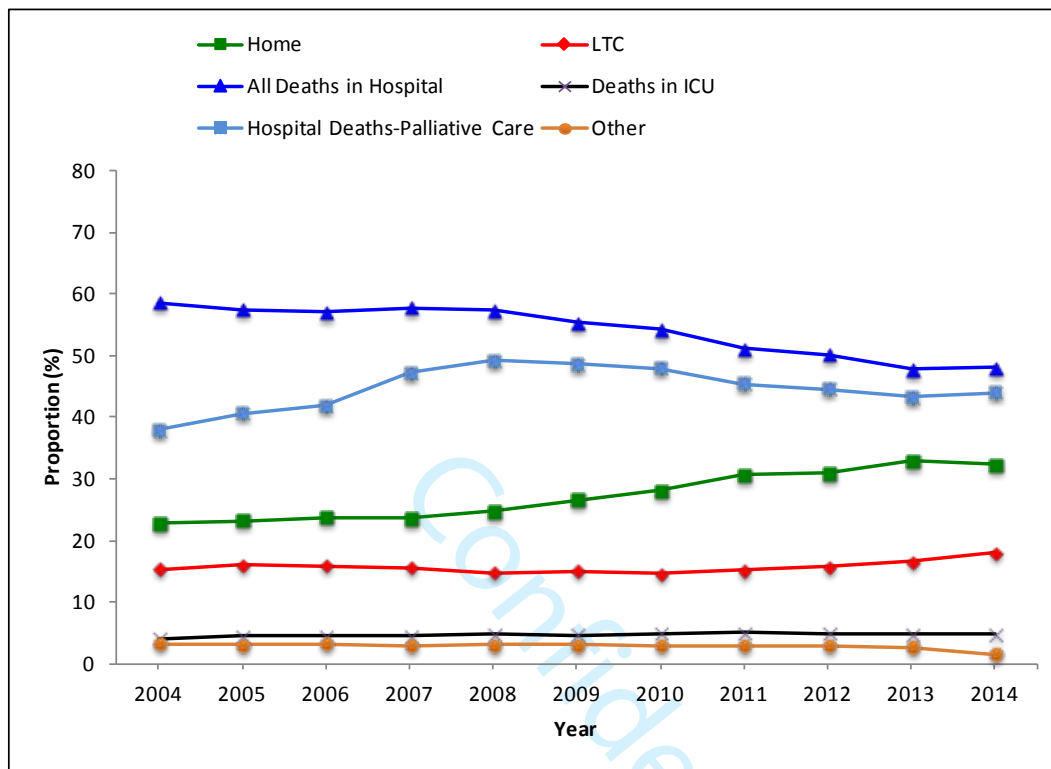

**Congestive Heart Failure**

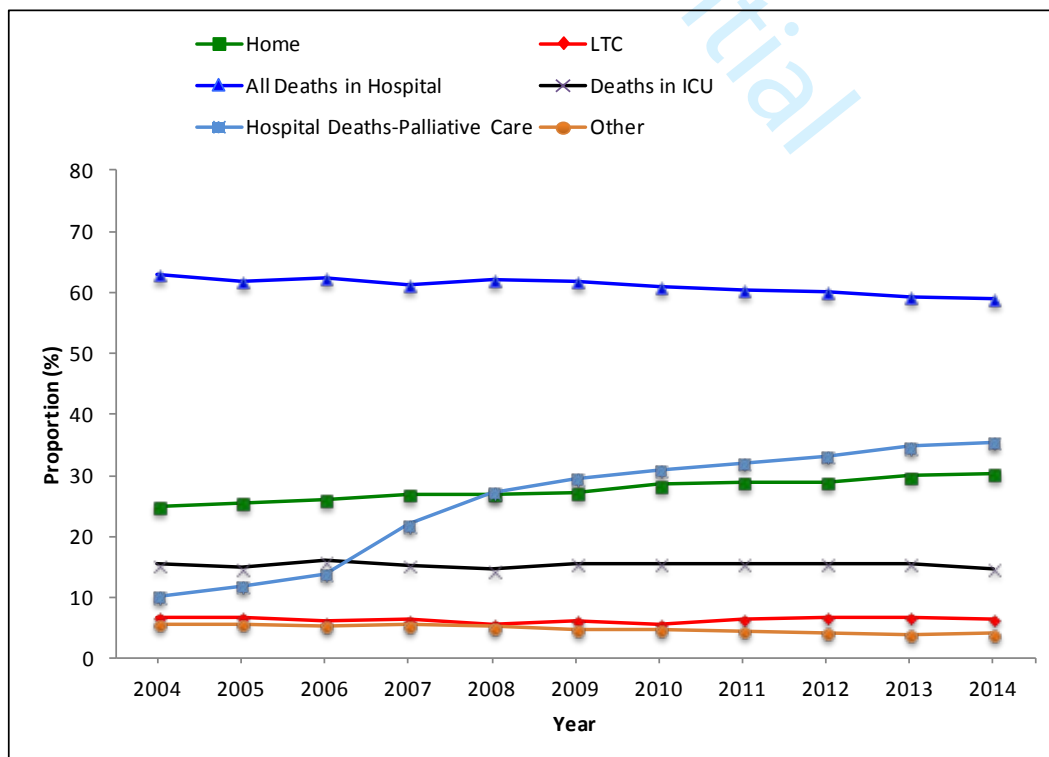

Supplemental Figure 1: Temporal trends in location of death stratified by chronic condition: Ontario 2004 –2014 (cont'd)\*

**COPD**

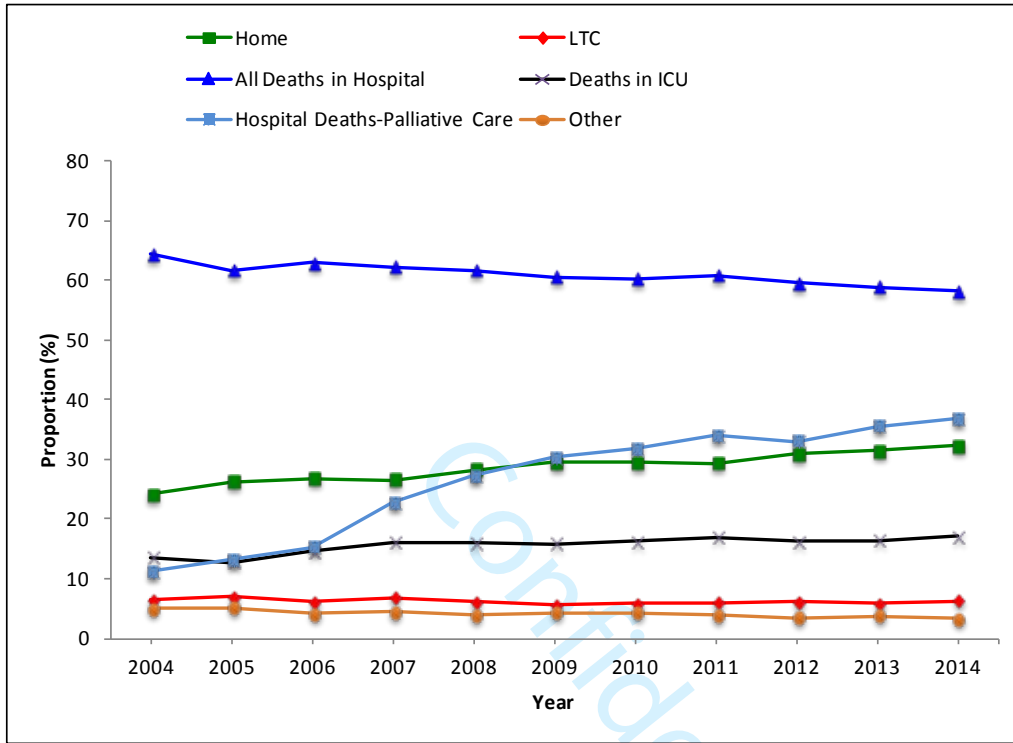

**Coronary Artery Disease**

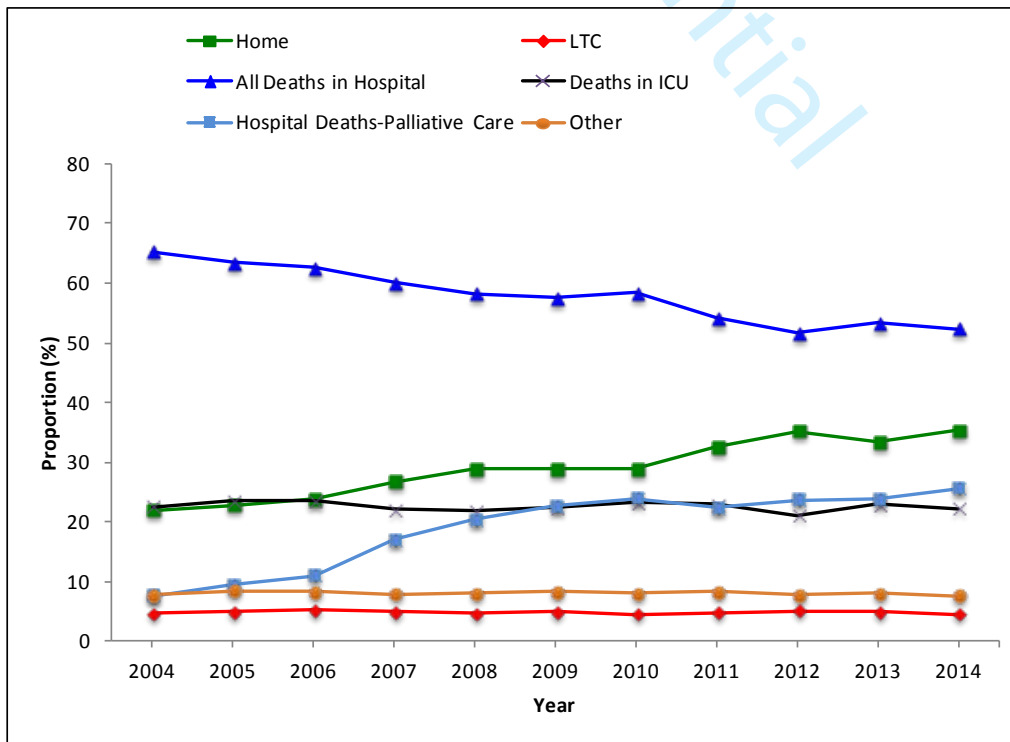

1  
2  
3  
4  
5  
6  
7  
8  
9  
10  
11  
12  
13  
14  
15  
16  
17  
18  
19  
20  
21  
22  
23  
24  
25  
26  
27  
28  
29  
30  
31  
32  
33  
34  
35  
36  
37  
38  
39  
40  
41  
42  
43  
44  
45  
46  
47  
48  
49  
50  
51  
52  
53  
54  
55  
56  
57  
58  
59  
60

Supplemental Figure 1: Temporal trends in location of death stratified by chronic condition: Ontario 2004 –2014 (cont'd)\*

**Dementia**

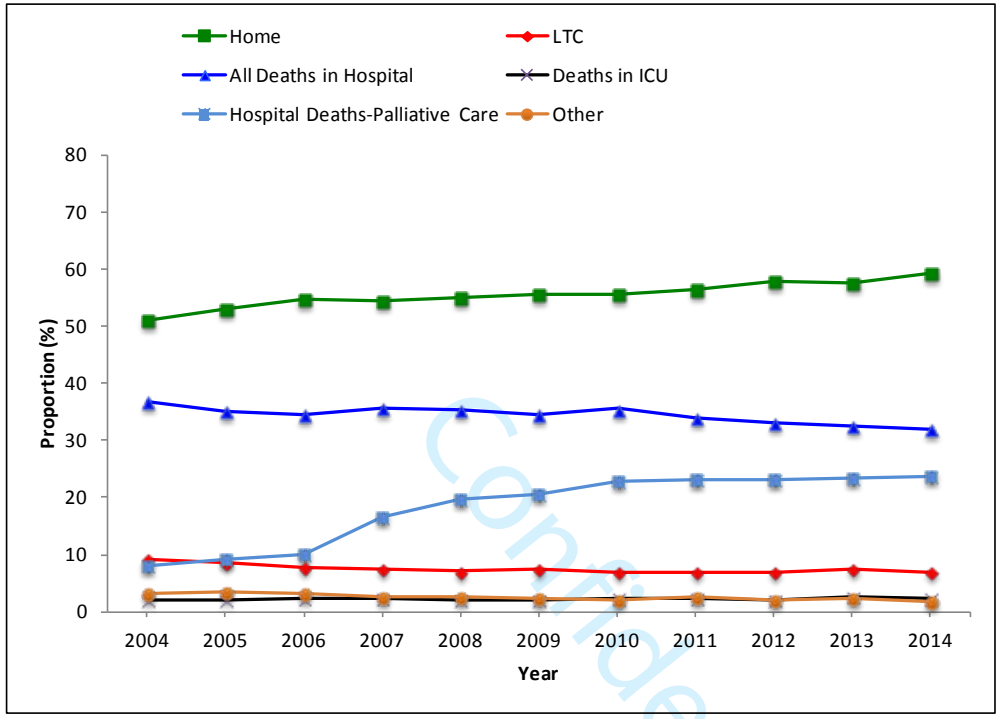

**Severe Liver Disease**

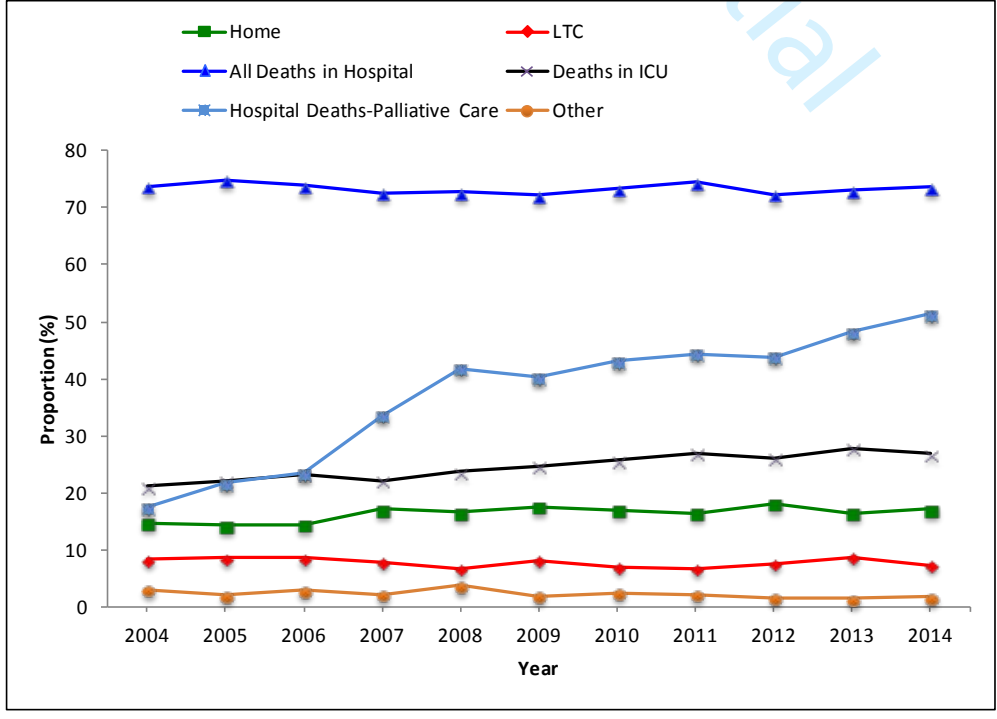

Supplemental Figure 1: Temporal trends in location of death stratified by chronic condition: Ontario 2004 –2014 (cont'd)\*

**Peripheral Vasular Disease**

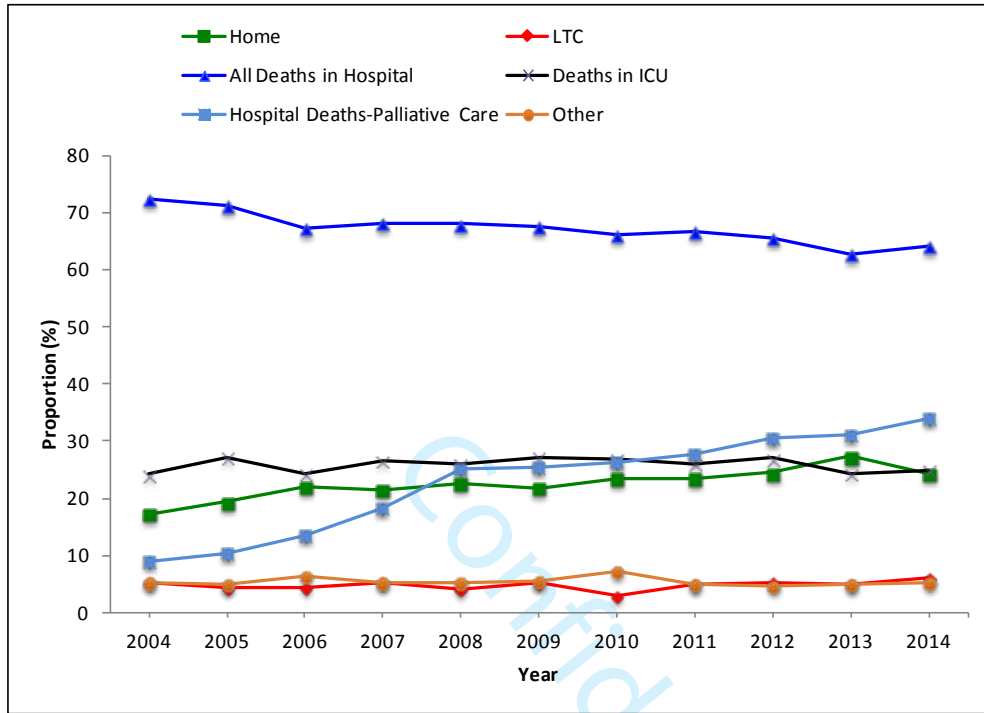

**Renal Failure**

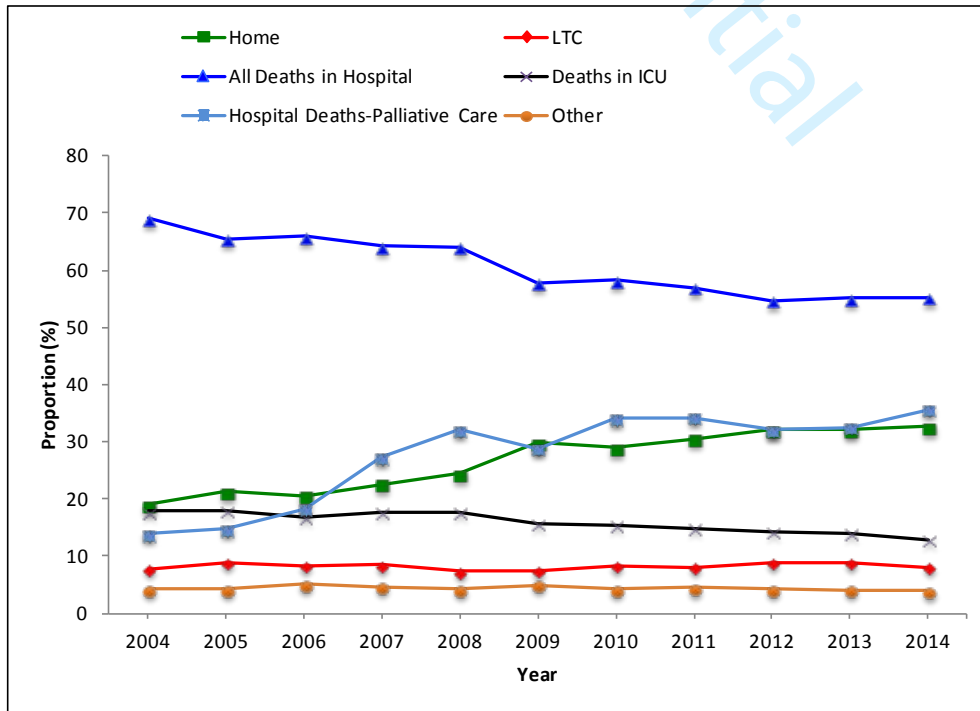

\* Diabetes with end-organ failure not included in trend analysis due to small numbers ( $\leq 5$ ) in some categories

Supplemental Figure 2: Receipt of palliative care during the terminal hospitalization among decedents dying in hospital: overall and by chronic condition

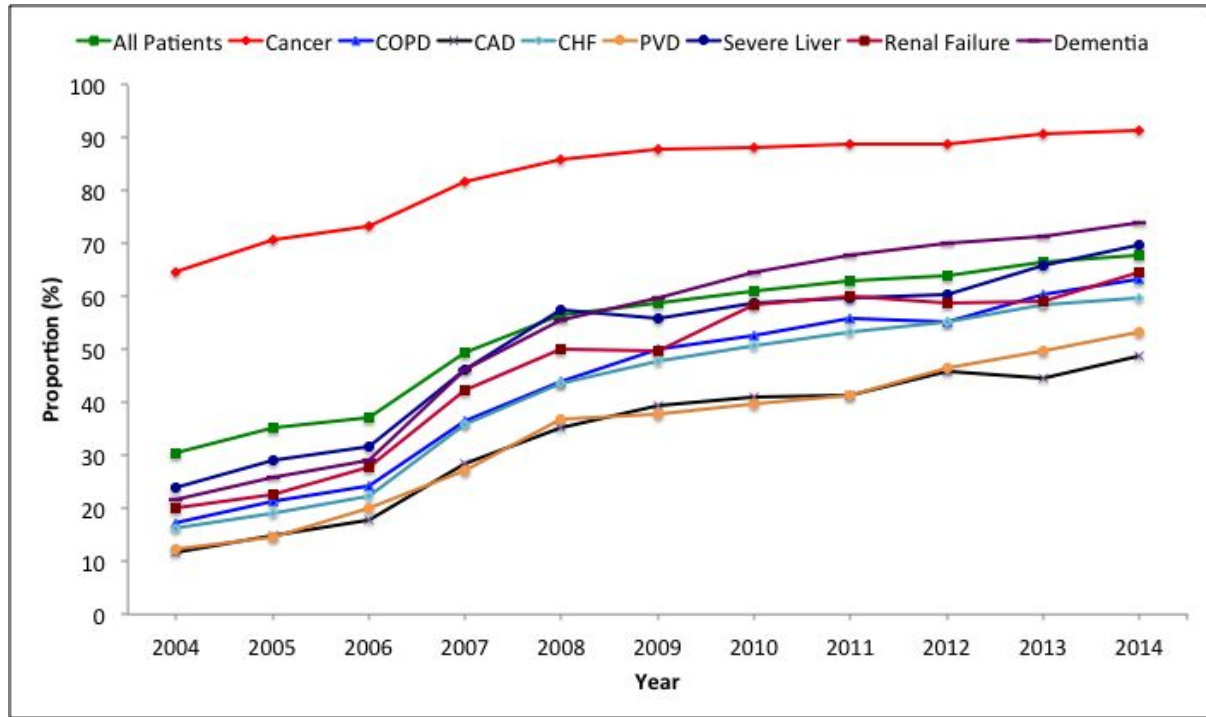

Confidential

Supplemental Table 1: Healthcare utilization in the last 6-months of life stratified by chronic condition

| Decedents          | Fiscal Year     | Hospital Admission % | ICU Admission % | ED Visits % | Saw ≥ 10 Different Physicians % | Mechanical Ventilation % |
|--------------------|-----------------|----------------------|-----------------|-------------|---------------------------------|--------------------------|
| Cancer (n=195,560) | <b>All</b>      | <b>91.9</b>          | <b>13.6</b>     | <b>89.7</b> | <b>76.6</b>                     | <b>8.0</b>               |
|                    | 2004            | 93.2                 | 13.3            | 88.0        | 68.7                            | 7.1                      |
|                    | 2005            | 92.7                 | 13.4            | 88.1        | 69.2                            | 7.6                      |
|                    | 2006            | 92.3                 | 13.2            | 88.8        | 72.1                            | 7.3                      |
|                    | 2007            | 92.2                 | 13.4            | 89.2        | 74.9                            | 7.8                      |
|                    | 2008            | 91.8                 | 13.1            | 89.4        | 76.4                            | 7.9                      |
|                    | 2009            | 92.1                 | 13.2            | 89.5        | 77.3                            | 8.0                      |
|                    | 2010            | 91.7                 | 13.6            | 90.1        | 79.0                            | 8.0                      |
|                    | 2011            | 91.5                 | 13.8            | 90.2        | 79.4                            | 8.3                      |
|                    | 2012            | 91.2                 | 14.4            | 90.8        | 79.8                            | 8.7                      |
|                    | 2013            | 91.1                 | 14.5            | 91.4        | 81.4                            | 8.5                      |
|                    | 2014            | 91.1                 | 13.6            | 91.2        | 82.3                            | 8.5                      |
|                    | COPD (n=48,755) | <b>All</b>           | <b>83.2</b>     | <b>29.9</b> | <b>87.9</b>                     | <b>59.6</b>              |
| 2004               |                 | 87.3                 | 29.6            | 89.7        | 51.2                            | 21.5                     |
| 2005               |                 | 85.9                 | 28.9            | 89.3        | 51.4                            | 21.0                     |
| 2006               |                 | 84.8                 | 29.1            | 88.9        | 57.0                            | 23.8                     |
| 2007               |                 | 83.7                 | 29.7            | 88.3        | 59.6                            | 24.6                     |
| 2008               |                 | 82.7                 | 28.4            | 87.2        | 58.1                            | 24.5                     |
| 2009               |                 | 81.9                 | 29.1            | 87.3        | 59.3                            | 23.9                     |
| 2010               |                 | 82.3                 | 30.2            | 87.6        | 62.2                            | 24.6                     |
| 2011               |                 | 82.8                 | 30.3            | 87.9        | 62.7                            | 25.5                     |
| 2012               |                 | 82.0                 | 29.7            | 87.6        | 62.3                            | 24.7                     |
| 2013               |                 | 82.3                 | 31.7            | 87.1        | 64.0                            | 26.8                     |
| 2014               |                 | 81.5                 | 31.1            | 87.1        | 63.2                            | 27.5                     |
| CAD (n=45,400)     |                 | <b>All</b>           | <b>75.1</b>     | <b>38.2</b> | <b>82.1</b>                     | <b>58.6</b>              |
|                    | 2004            | 83.2                 | 42.8            | 86.5        | 54.3                            | 25.4                     |
|                    | 2005            | 81.7                 | 40.6            | 86.0        | 54.6                            | 27.0                     |
|                    | 2006            | 79.5                 | 39.0            | 85.2        | 57.7                            | 26.8                     |
|                    | 2007            | 78.5                 | 38.1            | 84.6        | 59.8                            | 27.4                     |
|                    | 2008            | 75.5                 | 36.3            | 83.1        | 59.7                            | 25.5                     |
|                    | 2009            | 74.8                 | 38.6            | 82.3        | 60.2                            | 27.1                     |
|                    | 2010            | 74.1                 | 36.7            | 82.1        | 60.1                            | 27.7                     |
|                    | 2011            | 72.6                 | 36.5            | 81.4        | 60.3                            | 26.9                     |
|                    | 2012            | 70.1                 | 35.9            | 78.5        | 57.8                            | 26.7                     |
|                    | 2013            | 70.3                 | 39.0            | 78.6        | 59.2                            | 29.1                     |
|                    | 2014            | 68.5                 | 38.1            | 77.1        | 59.2                            | 29.0                     |

| Decedents                       | Fiscal Year   | Hospital admission | ICU admission | ED visits   | Saw $\geq$ 10 different physicians | Mechanical ventilation |             |
|---------------------------------|---------------|--------------------|---------------|-------------|------------------------------------|------------------------|-------------|
|                                 |               | %                  | %             | %           | %                                  | %                      |             |
| CHF (n=110,337)                 | <b>All</b>    | <b>84.8</b>        | <b>32.2</b>   | <b>88.8</b> | <b>66.3</b>                        | <b>20.5</b>            |             |
|                                 | 2004          | 88.2               | 34.3          | 90.5        | 56.8                               | 18.4                   |             |
|                                 | 2005          | 86.3               | 34.0          | 89.9        | 57.1                               | 18.6                   |             |
|                                 | 2006          | 85.4               | 32.7          | 89.3        | 61.2                               | 19.6                   |             |
|                                 | 2007          | 84.4               | 32.7          | 88.4        | 64.9                               | 19.5                   |             |
|                                 | 2008          | 83.7               | 30.7          | 88.4        | 64.8                               | 19.1                   |             |
|                                 | 2009          | 84.5               | 31.9          | 88.2        | 67.4                               | 20.6                   |             |
|                                 | 2010          | 83.8               | 30.9          | 88.0        | 68.7                               | 21.0                   |             |
|                                 | 2011          | 84.1               | 31.9          | 88.5        | 70.4                               | 21.3                   |             |
|                                 | 2012          | 83.8               | 32.7          | 88.4        | 70.1                               | 21.7                   |             |
|                                 | 2013          | 84.2               | 31.9          | 88.8        | 72.1                               | 22.5                   |             |
|                                 | 2014          | 84.6               | 30.9          | 88.8        | 72.9                               | 22.3                   |             |
|                                 | PVD (n=9,701) | <b>All</b>         | <b>81.8</b>   | <b>39.6</b> | <b>82.5</b>                        | <b>58.4</b>            | <b>31.7</b> |
|                                 |               | 2004               | 89.0          | 43.7        | 84.8                               | 54.1                   | 30.2        |
| 2005                            |               | 87.0               | 42.9          | 85.8        | 57.0                               | 30.5                   |             |
| 2006                            |               | 82.0               | 37.3          | 82.0        | 56.6                               | 30.0                   |             |
| 2007                            |               | 80.3               | 40.1          | 81.7        | 55.1                               | 31.3                   |             |
| 2008                            |               | 81.4               | 40.6          | 82.5        | 61.9                               | 33.1                   |             |
| 2009                            |               | 81.0               | 38.9          | 81.8        | 60.1                               | 33.1                   |             |
| 2010                            |               | 77.6               | 36.6          | 81.2        | 57.4                               | 31.3                   |             |
| 2011                            |               | 80.4               | 36.7          | 82.8        | 60.2                               | 31.1                   |             |
| 2012                            |               | 80.0               | 40.9          | 82.1        | 62.2                               | 35.6                   |             |
| 2013                            |               | 78.3               | 38.0          | 79.1        | 59.6                               | 32.1                   |             |
| 2014                            |               | 78.7               | 38.1          | 82.8        | 60.9                               | 31.6                   |             |
| Severe Liver Disease (n=14,643) |               | <b>All</b>         | <b>93.4</b>   | <b>41.0</b> | <b>94.5</b>                        | <b>77.6</b>            | <b>30.5</b> |
|                                 |               | 2004               | 94.1          | 34.7        | 94.2                               | 66.8                   | 25.3        |
|                                 | 2005          | 94.2               | 38.9          | 94.0        | 67.5                               | 27.7                   |             |
|                                 | 2006          | 94.5               | 40.1          | 94.7        | 73.3                               | 28.9                   |             |
|                                 | 2007          | 93.2               | 36.9          | 93.3        | 76.0                               | 27.2                   |             |
|                                 | 2008          | 92.1               | 37.2          | 94.1        | 76.4                               | 27.7                   |             |
|                                 | 2009          | 91.9               | 38.9          | 93.8        | 76.3                               | 29.8                   |             |
|                                 | 2010          | 93.8               | 39.9          | 95.2        | 79.2                               | 30.2                   |             |
|                                 | 2011          | 94.0               | 42.0          | 95.8        | 81.3                               | 33.4                   |             |
|                                 | 2012          | 92.4               | 43.5          | 93.8        | 80.9                               | 31.9                   |             |
|                                 | 2013          | 94.0               | 47.1          | 95.0        | 84.4                               | 34.7                   |             |
|                                 | 2014          | 93.9               | 47.6          | 95.6        | 85.1                               | 35.5                   |             |

| Decedents                                 | Fiscal Year | Hospital admission | ICU admission | ED visits   | Saw ≥ 10 different physicians | Mechanical ventilation |
|-------------------------------------------|-------------|--------------------|---------------|-------------|-------------------------------|------------------------|
|                                           |             | %                  | %             | %           | %                             | %                      |
| Diabetes (with end-organ failure (n=745)) | <b>All</b>  | <b>72.6</b>        | <b>27.7</b>   | <b>81.8</b> | <b>66.5</b>                   | <b>22.4</b>            |
|                                           | 2004        | 100.0              | 32.1          | 85.7        | 67.9                          | 25.0                   |
|                                           | 2005        | 76.7               | 30.0          | 93.3        | 53.3                          | 13.3                   |
|                                           | 2006        | 76.9               | 36.9          | 80.0        | 63.1                          | 24.6                   |
|                                           | 2007        | 74.0               | 20.6          | 82.2        | 63.0                          | 13.7                   |
|                                           | 2008        | 71.2               | 17.8          | 82.2        | 76.7                          | 16.4                   |
|                                           | 2009        | 73.5               | 33.8          | 80.9        | 67.7                          | 27.9                   |
|                                           | 2010        | 64.5               | 25.8          | 74.2        | 59.7                          | 25.8                   |
|                                           | 2011        | 71.1               | 24.1          | 75.9        | 63.9                          | 20.5                   |
|                                           | 2012        | 71.6               | 31.1          | 85.1        | 66.2                          | 32.4                   |
|                                           | 2013        | 69.6               | 28.3          | 79.4        | 67.4                          | 23.9                   |
|                                           | 2014        | 70.4               | 29.6          | 82.7        | 72.5                          | 23.5                   |
| Renal Failure (n=29,199)                  | <b>All</b>  | <b>85.3</b>        | <b>30.3</b>   | <b>87.8</b> | <b>72.3</b>                   | <b>20.3</b>            |
|                                           | 2004        | 91.6               | 35.6          | 90.0        | 72.3                          | 22.4                   |
|                                           | 2005        | 90.0               | 33.4          | 89.4        | 72.1                          | 21.3                   |
|                                           | 2006        | 88.2               | 31.4          | 89.8        | 73.5                          | 20.5                   |
|                                           | 2007        | 87.4               | 33.2          | 89.1        | 74.9                          | 22.3                   |
|                                           | 2008        | 86.2               | 30.4          | 88.0        | 75.1                          | 21.6                   |
|                                           | 2009        | 80.0               | 27.7          | 85.0        | 70.1                          | 18.9                   |
|                                           | 2010        | 80.9               | 26.7          | 86.4        | 69.1                          | 18.8                   |
|                                           | 2011        | 81.3               | 27.3          | 86.2        | 72.0                          | 18.2                   |
|                                           | 2012        | 80.4               | 27.3          | 85.2        | 69.0                          | 18.5                   |
|                                           | 2013        | 82.2               | 28.2          | 86.8        | 72.8                          | 20.3                   |
|                                           | 2014        | 81.9               | 26.9          | 86.7        | 71.6                          | 18.1                   |
| Dementia (n=86,778)                       | <b>All</b>  | <b>63.4</b>        | <b>6.5</b>    | <b>70.9</b> | <b>39.4</b>                   | <b>4.2</b>             |
|                                           | 2004        | 71.9               | 6.9           | 77.2        | 36.0                          | 4.0                    |
|                                           | 2005        | 67.4               | 6.2           | 74.7        | 33.5                          | 4.0                    |
|                                           | 2006        | 64.0               | 6.4           | 72.0        | 35.4                          | 4.0                    |
|                                           | 2007        | 63.9               | 6.2           | 71.7        | 37.9                          | 3.6                    |
|                                           | 2008        | 62.3               | 5.7           | 69.7        | 37.7                          | 3.3                    |
|                                           | 2009        | 62.3               | 6.4           | 69.2        | 39.3                          | 4.4                    |
|                                           | 2010        | 63.8               | 6.8           | 71.4        | 42.3                          | 4.2                    |
|                                           | 2011        | 62.5               | 7.1           | 70.4        | 40.6                          | 4.4                    |
|                                           | 2012        | 61.7               | 6.3           | 69.2        | 40.3                          | 4.4                    |
|                                           | 2013        | 61.9               | 6.9           | 69.4        | 42.3                          | 4.6                    |
|                                           | 2014        | 61.2               | 6.6           | 69.4        | 42.4                          | 4.3                    |

COPD- Chronic obstructive pulmonary disease; CAD – Coronary artery disease; CHF- Congestive heart failure; PVD – Peripheral vascular disease; ICU – Intensive Care Unit; ED – Emergency Department



Supplemental Table 2: Health care costs (adjusted to 2014 Canadian dollars) in the last 6-months of life stratified by site of death

|                                    | All patients<br>N=962,462 | Died in hospital<br>N=433,074 | Died out of hospital<br>N=529,388 |
|------------------------------------|---------------------------|-------------------------------|-----------------------------------|
| <b>Cost Categories</b>             | <b>Cost (\$)</b>          |                               |                                   |
| <b>In-patient</b>                  |                           |                               |                                   |
| Mean (SD)                          | 17,521 (32,456)           | 28,387 (41,727)               | 8,631 (17,753)                    |
| Median (IQR)                       | 7,824 (0-21,426)          | 16,284 (7,290-33,216)         | 0 (0-11,060)                      |
| <b>Hospital outpatient clinic</b>  |                           |                               |                                   |
| Mean (SD)                          | 1,294 (2,571)             | 1,841 (3,161)                 | 847 (1,844)                       |
| Median (IQR)                       | 359 (0-1,558)             | 779 (0-2,279)                 | 0 (0-966)                         |
| <b>Same day surgery*</b>           |                           |                               |                                   |
| Mean (SD)                          | 163 (691)                 | 213 (806)                     | 121 (576)                         |
| <b>Emergency department</b>        |                           |                               |                                   |
| Mean (SD)                          | 936 (930)                 | 1,291 (922)                   | 646 (831)                         |
| Median (IQR)                       | 754 (205-1,351)           | 1,061 (697-1,660)             | 412 (0-976)                       |
| <b>Drug cost</b>                   |                           |                               |                                   |
| Mean (SD)                          |                           |                               |                                   |
| Median (IQR)                       | 980 (311-1,939)           | 896 (298-1,794)               | 1,058 (325-2,054)                 |
| <b>Rehabilitation services*</b>    |                           |                               |                                   |
| Mean (SD)                          | 563 (4,807)               | 662 (5,122)                   | 482 (4,532)                       |
| <b>Complex continuing care*</b>    |                           |                               |                                   |
| Mean (SD)                          | 2,420 (11,575)            | 843 (6,923)                   | 3,710 (14,166)                    |
| <b>Long-term care *</b>            |                           |                               |                                   |
| Mean (SD)                          | 4,215 (8,072)             | 1,879 (5,577)                 | 6,125 (9,215)                     |
| <b>Home care services</b>          |                           |                               |                                   |
| Mean (SD)                          | 2,220 (4,828)             | 2,083 (4,103)                 | 2,332 (5,346)                     |
| Median (IQR)                       | 414 (0-2,334)             | 616 (0-2,382)                 | 0 (0-2,275)                       |
| <b>Physician (fee for service)</b> |                           |                               |                                   |
| Mean (SD)                          | 3,296 (4,950)             | 4,556 (5,593)                 | 2,265 (4,075)                     |
| Median (IQR)                       | 2,108 (832-4,313)         | 3,172 (1,707-5,664)           | 1,233 (485-3,077)                 |
| <b>Total cost</b>                  |                           |                               |                                   |
| Mean (SD)                          | 36,335 (40,369)           | 45,621 (49,090)               | 28,739 (29,379)                   |
| Median (IQR)                       | 26,329 (13,873-45,279)    | 32,291 (18,245-55,308)        | 22,895 (7,636-36,931)             |

\* Median (IQR) costs are 0 for these health sectors

## Appendix: Cost Estimation

Healthcare costs are derived from the perspective of Ontario's Ministry of Health and Long-Term Care. The costing methodology computes costs for services utilized during encounters with the publicly funded healthcare system, with the approach to costing differing based on the type of encounter.<sup>1</sup> Table 1, summarizes the databases used to identify healthcare utilization and the costing approach for each health sector. The databases and costing algorithm used in this study are held and maintained by ICES.

**Table 1: Administrative databases to identify healthcare use and methods for cost estimation**

| Cost sector                                     | Database Source                                   | Description of database                                                                                                                                                                        | Method of cost estimation                                                                                                                                           |
|-------------------------------------------------|---------------------------------------------------|------------------------------------------------------------------------------------------------------------------------------------------------------------------------------------------------|---------------------------------------------------------------------------------------------------------------------------------------------------------------------|
| <b>Hospital</b>                                 |                                                   |                                                                                                                                                                                                |                                                                                                                                                                     |
| Inpatient acute care                            | CIHI Discharge Abstract Database (CIHI-DAD)       | Demographic, administrative and clinical data on acute care hospital separations in Ontario.                                                                                                   | Resource intensity weights (RIW) <sup>2</sup> multiplied by cost per weighted case (CPWC)                                                                           |
| Emergency room visits                           | National Ambulatory Care Reporting System (NACRS) | Captures administrative, demographic and clinical data for emergency department and ambulatory care visits in Ontario.                                                                         | RIW x CPWC                                                                                                                                                          |
| Same day surgery                                | NACRS<br>CIHI Same Day Surgery (CIHI-SDS)         | Contains administrative and patient-level clinical and demographic data for day surgery hospitals in Ontario.                                                                                  | RIW x CPWC                                                                                                                                                          |
| Outpatient clinic visits                        | NACRS                                             |                                                                                                                                                                                                | RIW x CPWC                                                                                                                                                          |
| <b>Physician services</b>                       |                                                   |                                                                                                                                                                                                |                                                                                                                                                                     |
| Fee for service claims and shadow-billed claims | Ontario Health Insurance Plan (OHIP)              | Claims data for services provided by eligible providers (includes physicians, nurse practitioners, and laboratories).                                                                          | Claims-based: billed costs per visit and services provided based on the province's approved rates.                                                                  |
| Primary care capitation based models            | Client Agency Program Enrolment                   | Contains information on individuals enrolled in a primary care model in Ontario                                                                                                                | Capitation payments: base rate multiplied by age-sex multiplier, with adjustment for relevant premiums                                                              |
| <b>Complex Continuing Care</b>                  | Continuing Care Reporting System (CCRS)           | Captures administrative, demographic, clinical and functional data on individuals receiving continuing care services in designated facilities (hospitals and long-term care homes) in Ontario. | Cost derived from case mix index, number of days in care and resource utilization groups: weighted length of stay (LOS) multiplied by cost per weighted day (CPWD). |
| <b>Long-term Care</b>                           | CCRS                                              |                                                                                                                                                                                                | Cost estimated from fixed per diem costs based on payment rates set by the province multiplied by LOS.                                                              |
| <b>Rehabilitation</b>                           | National Rehabilitation Reporting System (NRS)    | Contains administrative, demographic and other client-level data from participating adult inpatient rehabilitation facilities and programs across Ontario                                      | Rehabilitation cost weights (RCW) x rehabilitation CPWC                                                                                                             |

| <b>Cost sector</b>        | <b>Database Source</b>                                                     | <b>Description of database</b>                                                                                                                 | <b>Method of cost estimation</b>                                                                                                                                    |
|---------------------------|----------------------------------------------------------------------------|------------------------------------------------------------------------------------------------------------------------------------------------|---------------------------------------------------------------------------------------------------------------------------------------------------------------------|
| <b>Mental health care</b> | Ontario mental health reporting system                                     | Captures data on individuals receiving adult mental health services in designated inpatient facilities in Ontario.                             | Cost derived from case mix index, number of days in care and resource utilization groups: weighted length of stay (LOS) multiplied by cost per weighted day (CPWD). |
| <b>Home Care</b>          | Home Care Database (HCD) Resident Assessment Instrument-Home Care (RAI-HC) | Contains administrative, demographic and other client-level data on provincially funded home care services.                                    | Standard cost per service multiplied by the number of hours (or visits) of service.                                                                                 |
| <b>Prescription drugs</b> | Ontario Drug Benefit                                                       | Captures claims for prescriptions dispensed to Ontarians eligible for the Ontario Drug Benefit program (primarily individuals $\geq 65$ years) | Total costs paid by the provincial health plan for eligible individuals.                                                                                            |
| <b>Non-physician</b>      | OHIP                                                                       |                                                                                                                                                | Billed costs per visit and services provided by eligible non-physician providers.                                                                                   |
| <b>Laboratory</b>         | OHIP                                                                       |                                                                                                                                                | Costs based on established diagnostic tests fees (technical and professional fees)                                                                                  |
| <b>Assistive device</b>   | Assistive Devices Program (ADP)                                            |                                                                                                                                                | Amount paid by the province to individuals for high-cost medical equipment.                                                                                         |

\*CIHI - Canadian Institute for Health Information

## References

1. Wodchis WP, Bushmenev K, Nikitovic M, McKillop I. Guidelines on Person-Level Costing Using Administrative Databases in Ontario [Internet]. 2013: [http://www.hsprn.ca/uploads/files/Guidelines\\_on\\_PersonLevel\\_Costing\\_May\\_2013.pdf](http://www.hsprn.ca/uploads/files/Guidelines_on_PersonLevel_Costing_May_2013.pdf) Last Accessed: May 23, 2018
2. Canadian Institute for Health Information. Case Mix: <https://www.cihi.ca/en/submit-data-and-view-standards/methodologies-and-decision-support-tools/case-mix> Last Accessed: November 2, 2018
